# Supplementary material
Source: PubMed Central journal article supplement (PMC9285652)

Figure E1

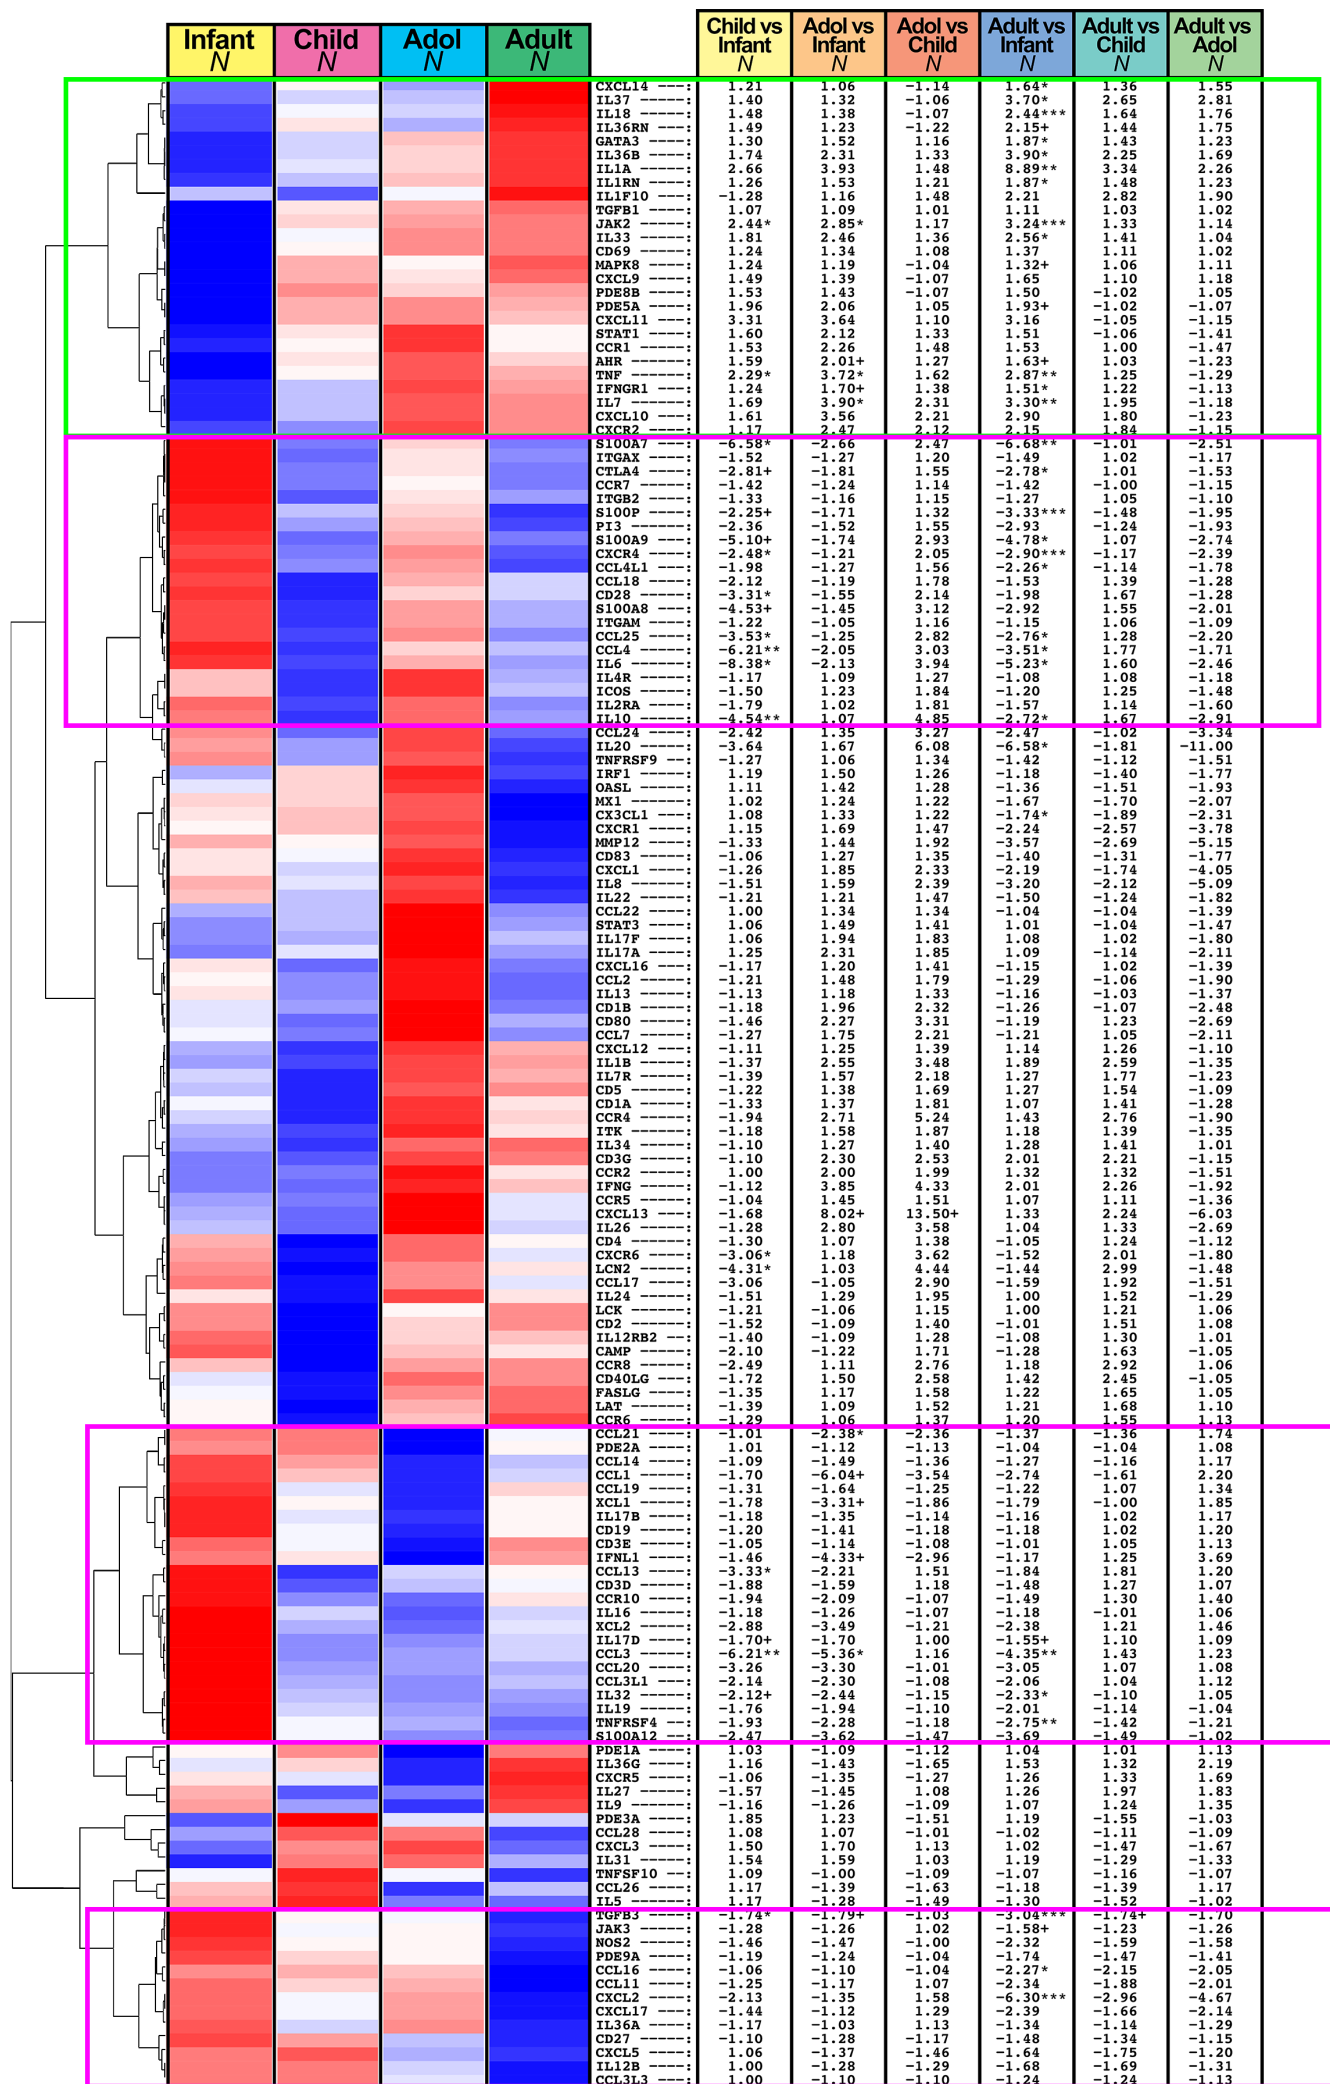

Figure E2

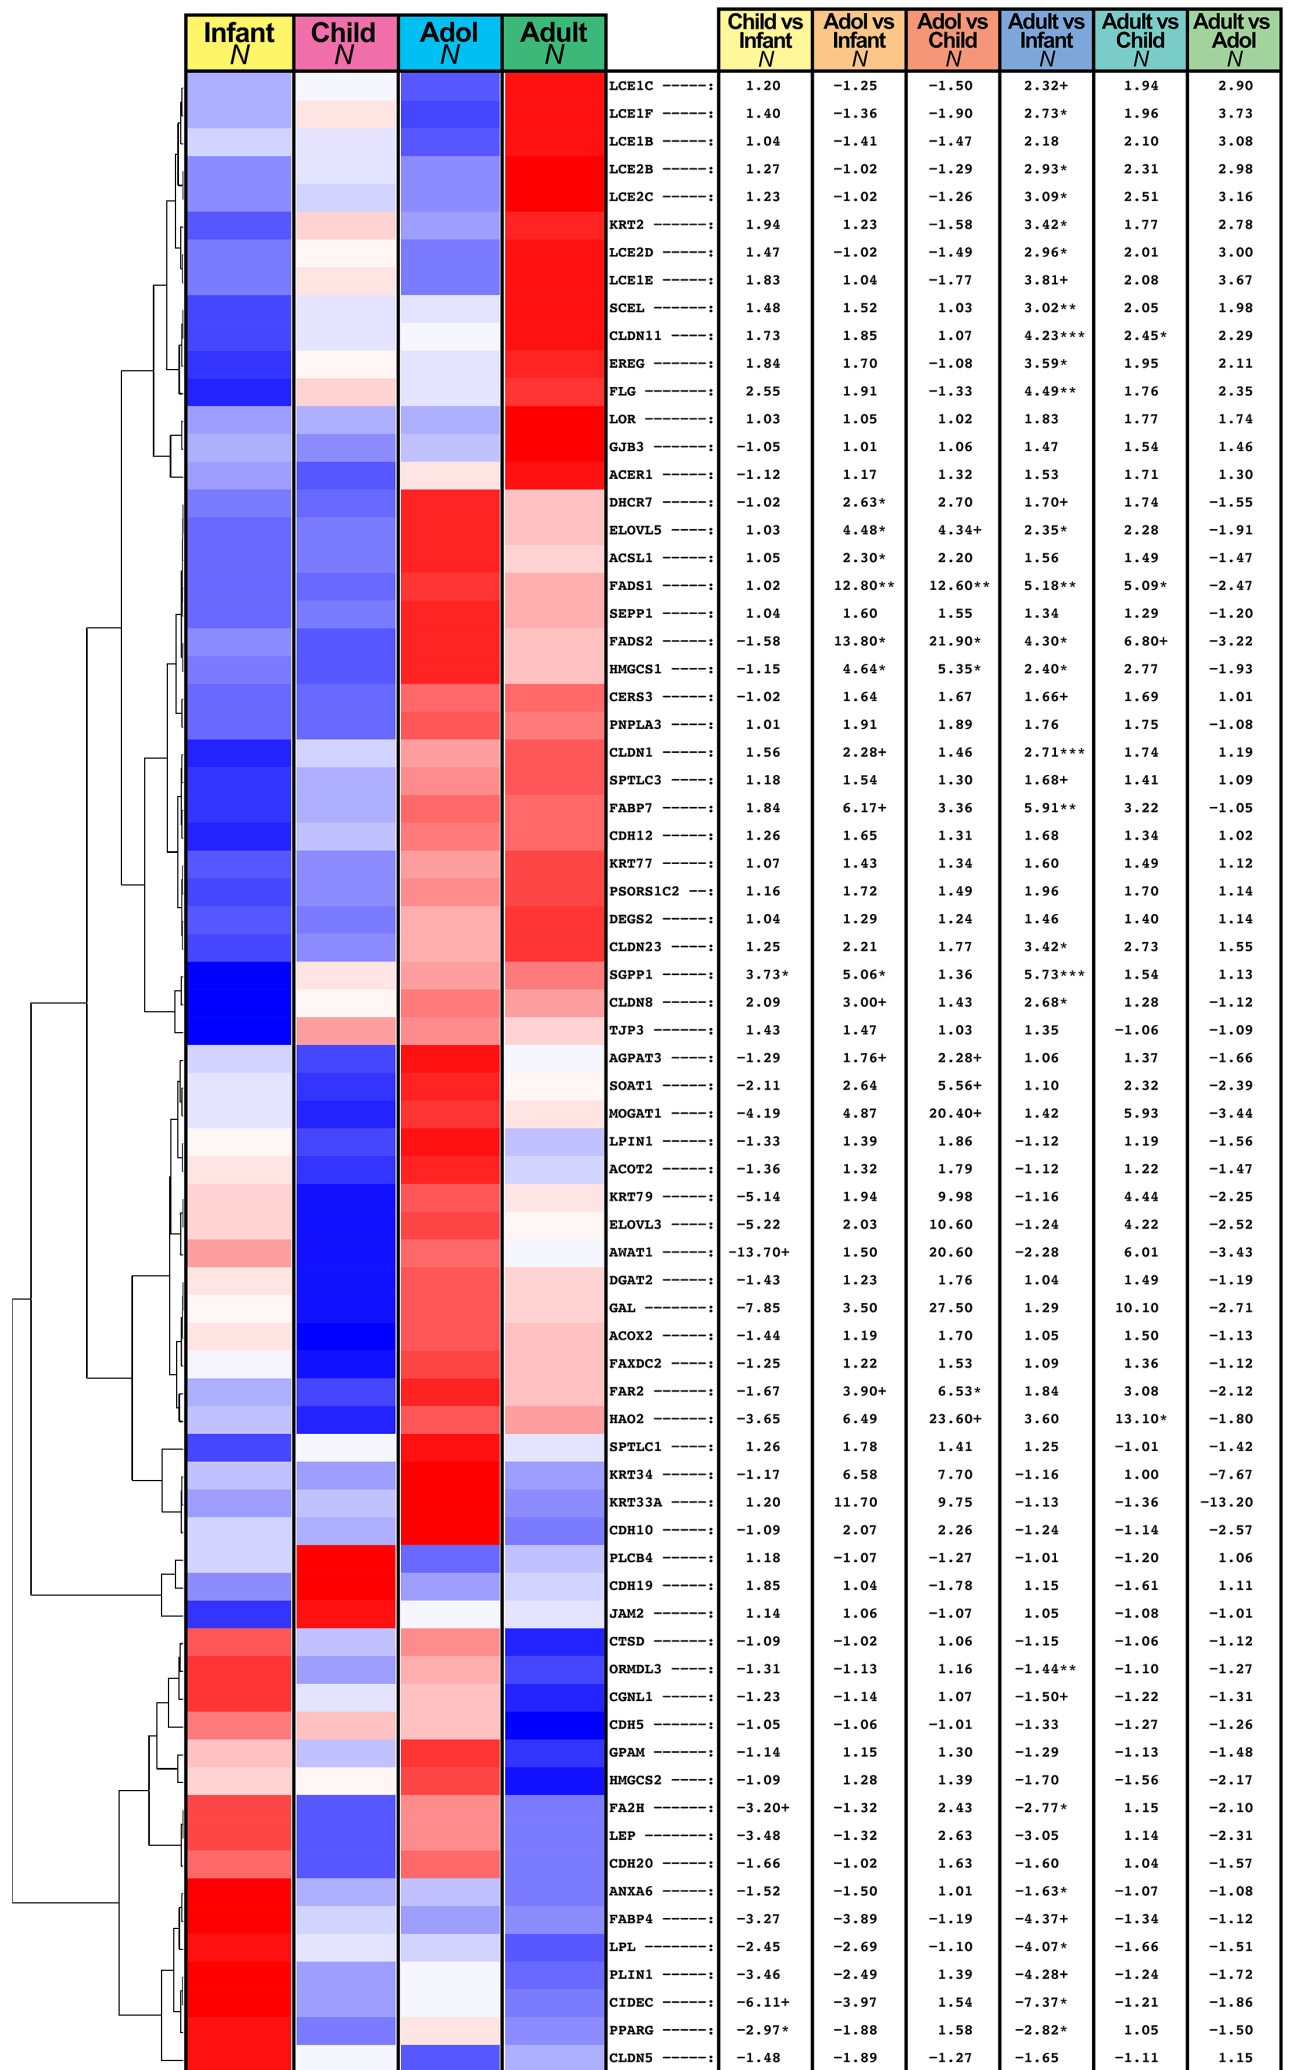



Figure E3

**A** GSVA Th17-Related Genes **B** Epidermal Thickness

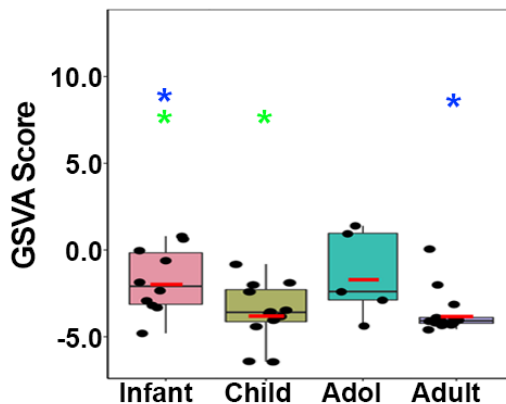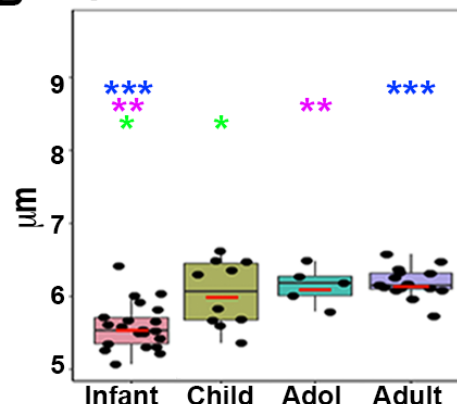

**C** TRAIL

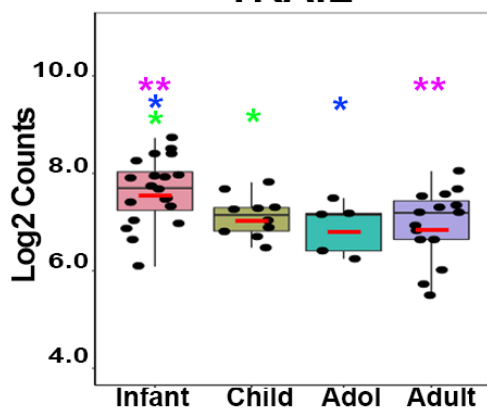

**D** Neutrophil Elastase

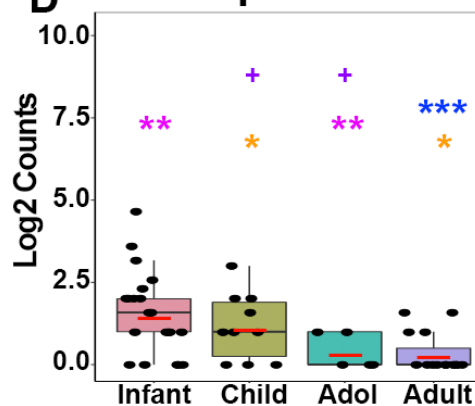

**E** Major Basic Protein

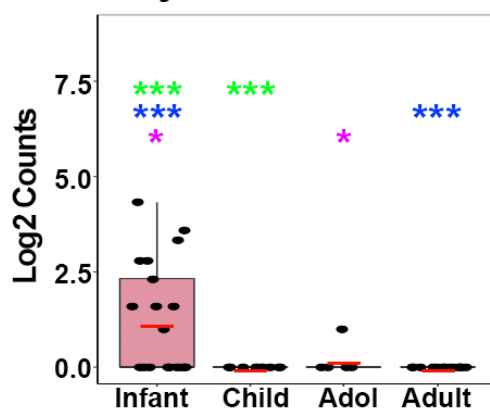

**F** FC<sub>ε</sub>R1

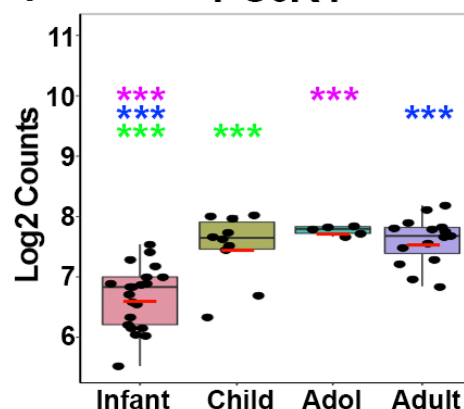

# Figure E4

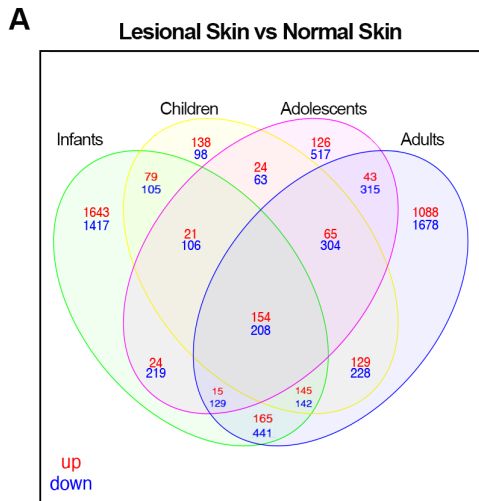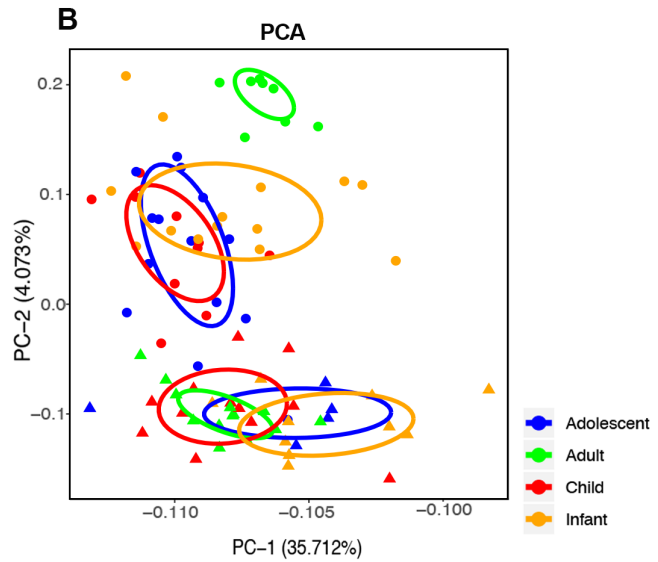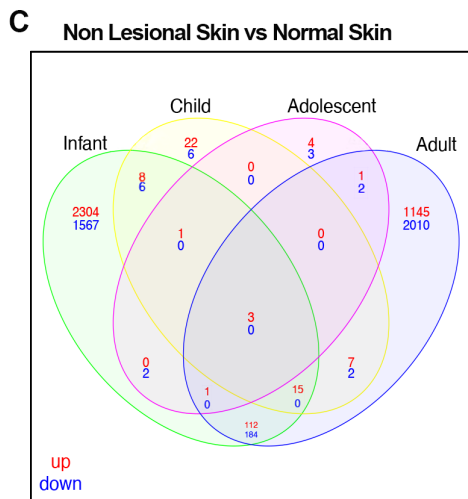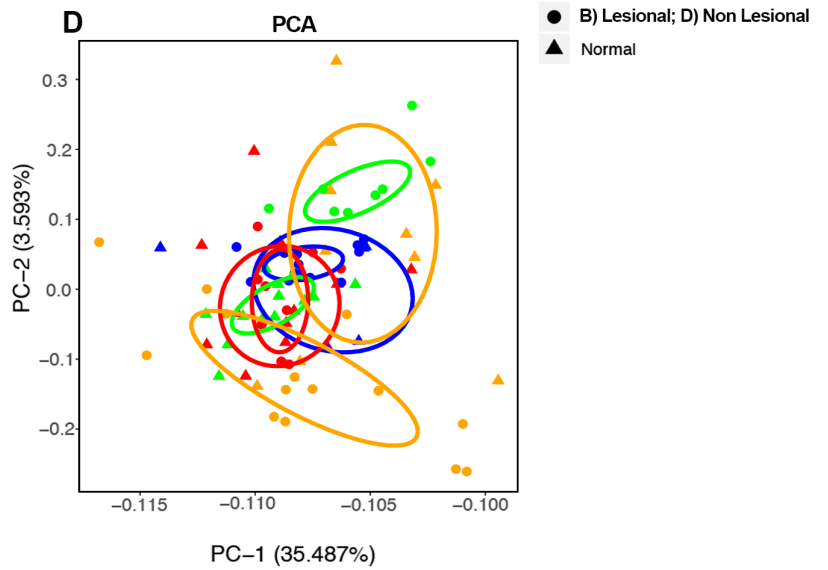

Figure E5

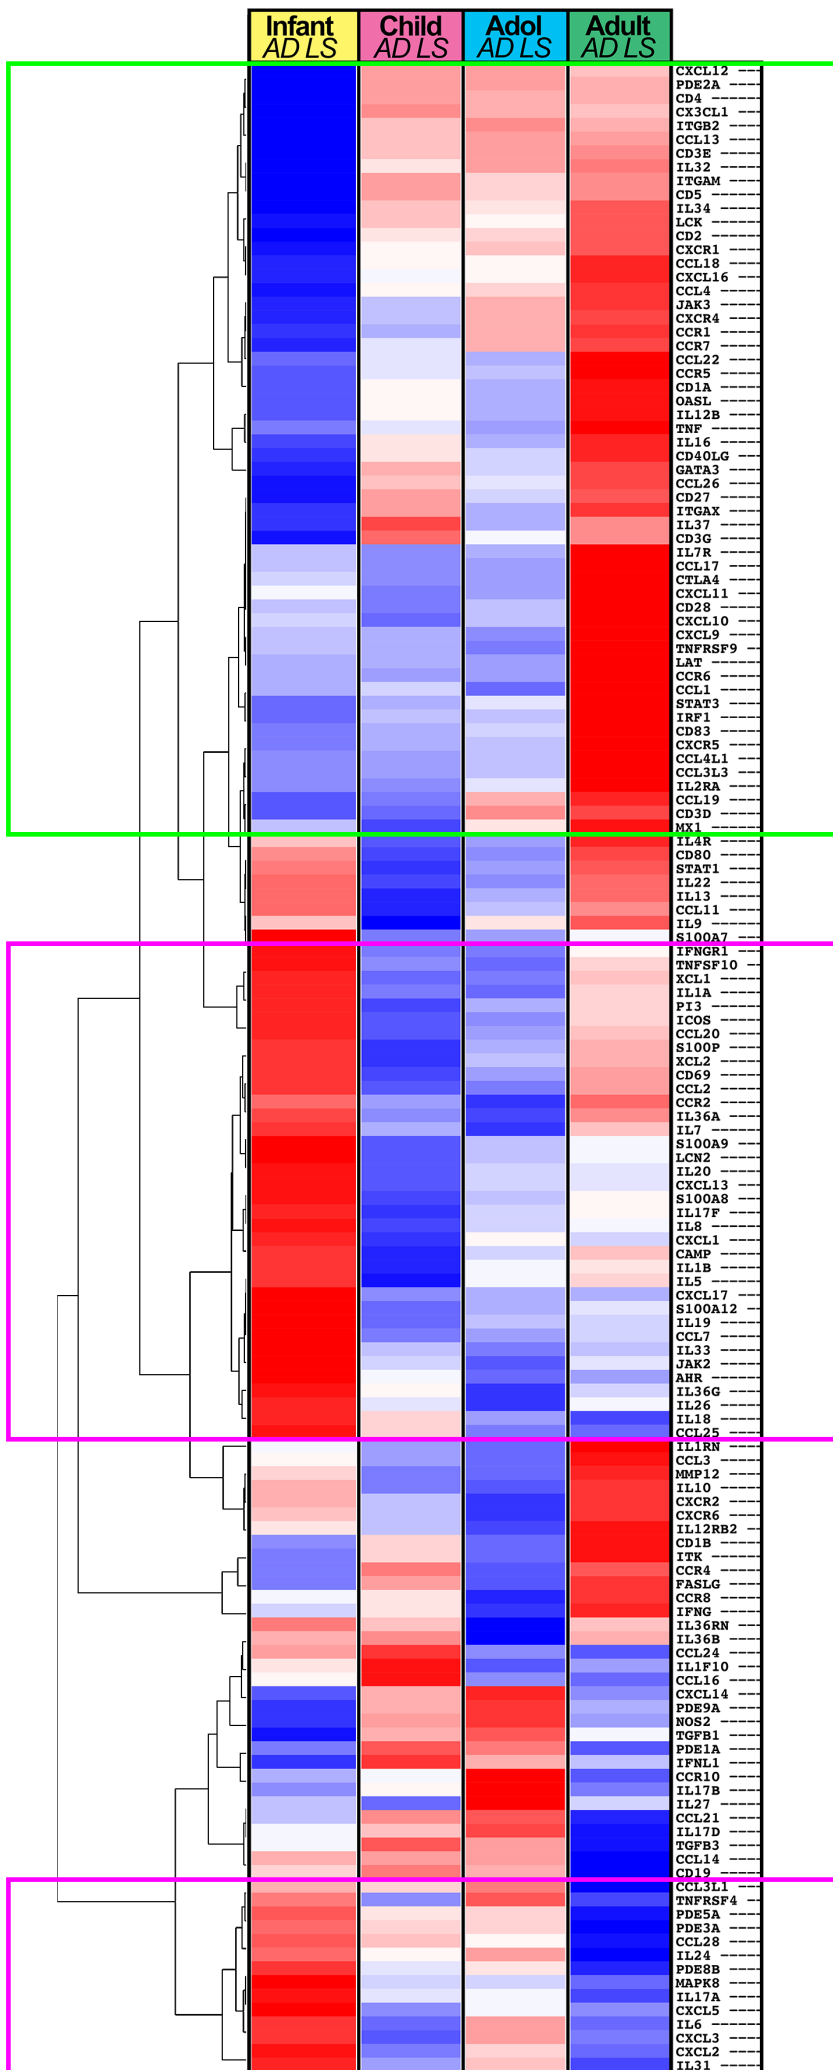

Figure E6

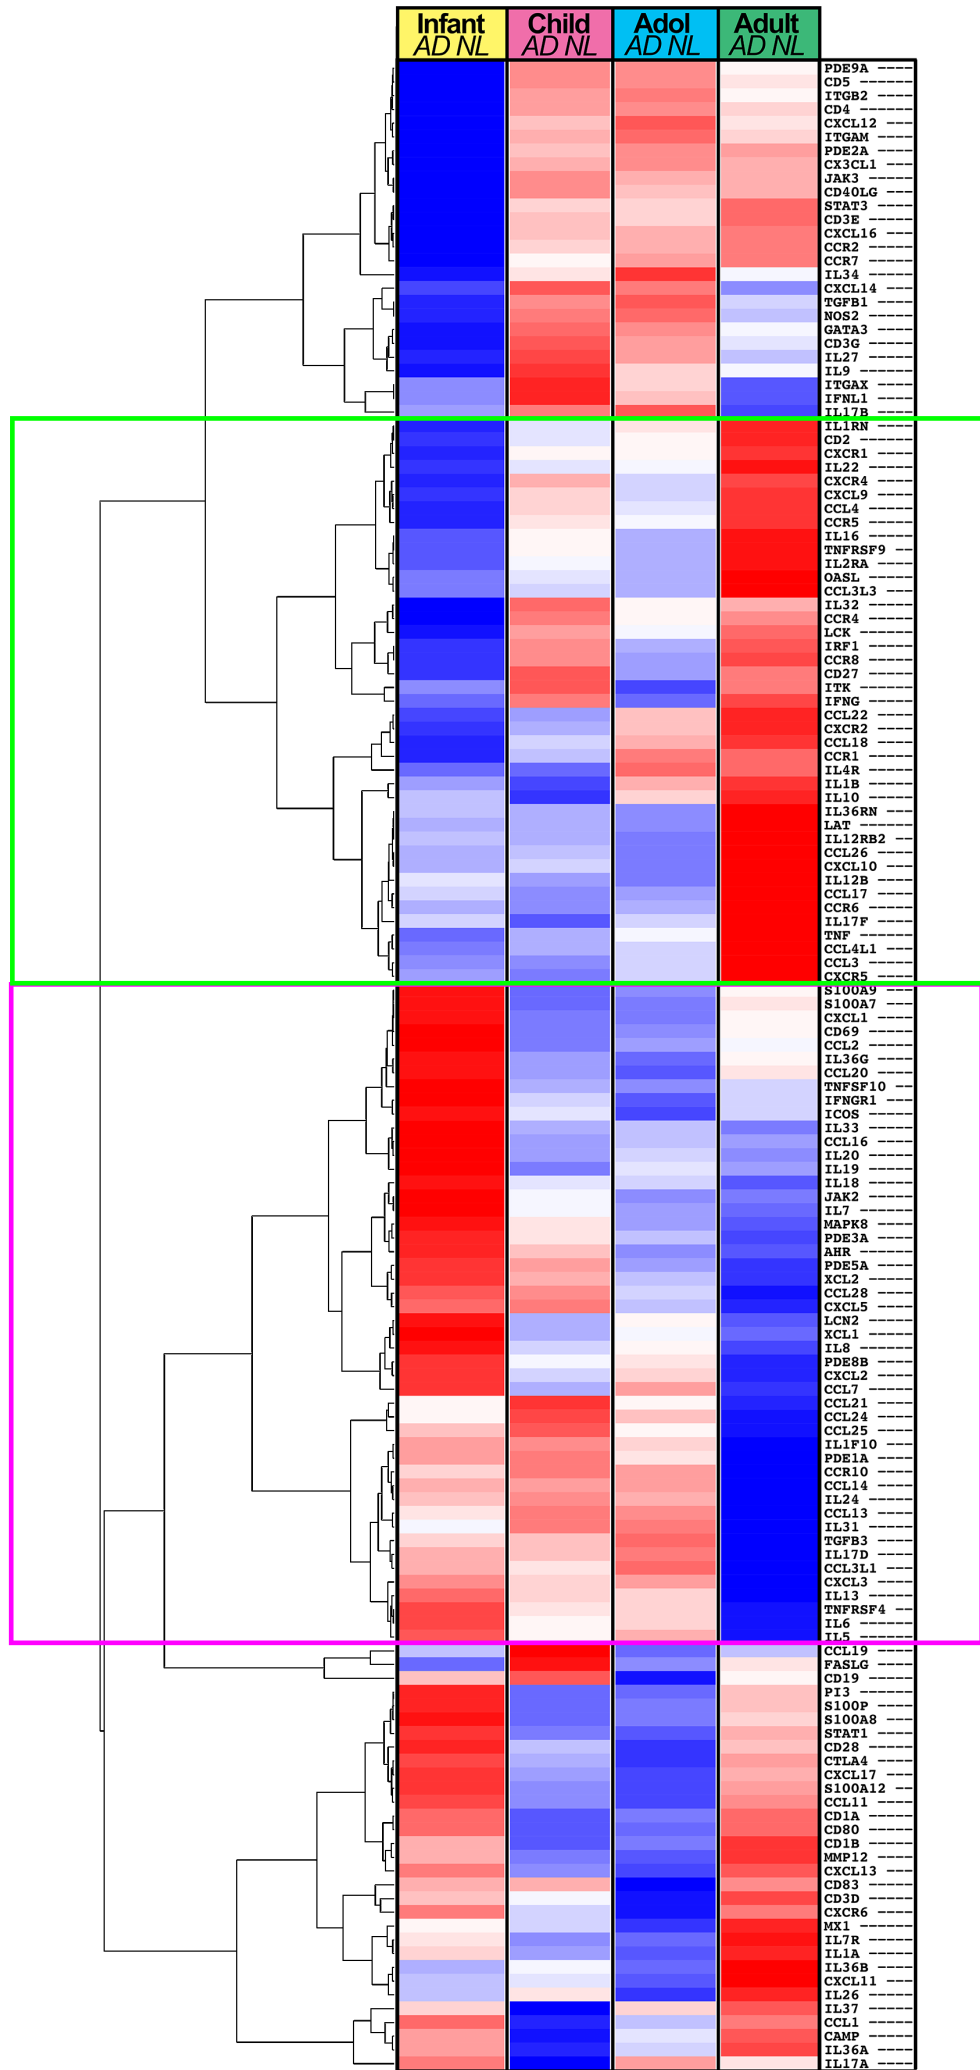

Figure E7

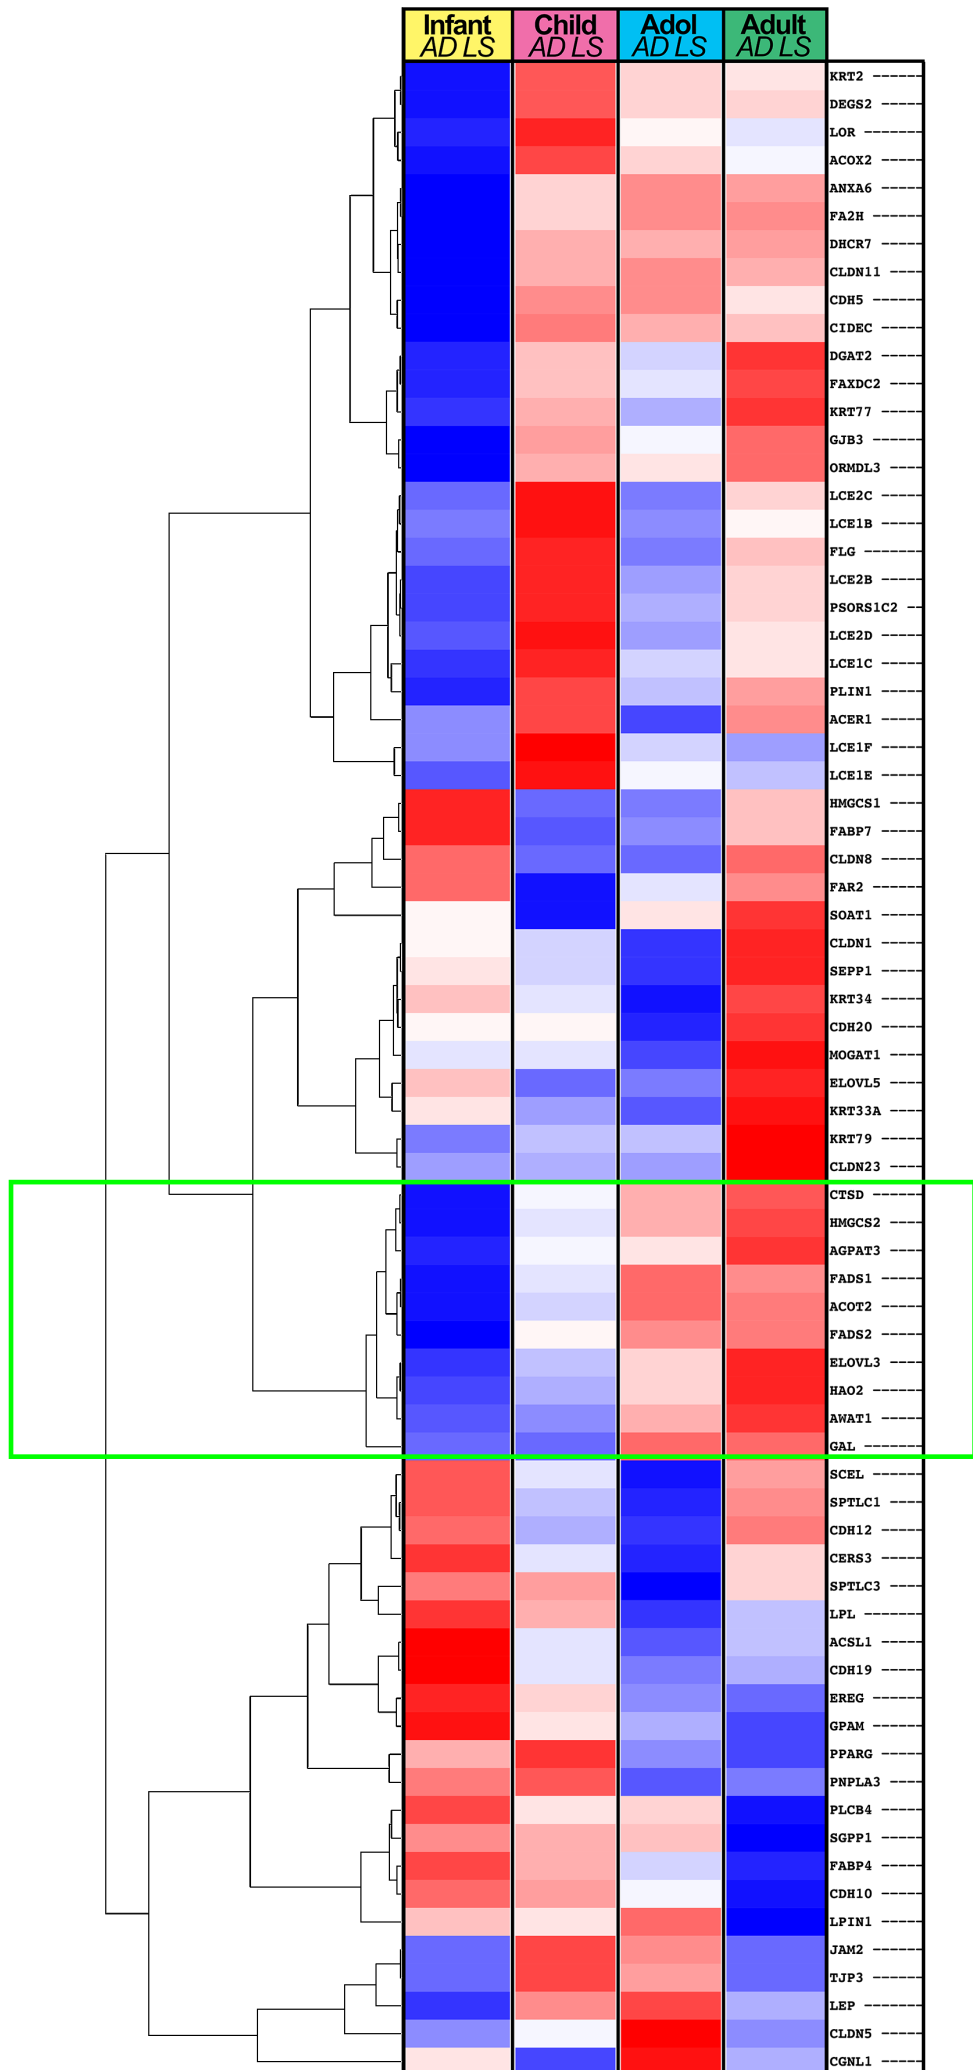



Figure E8

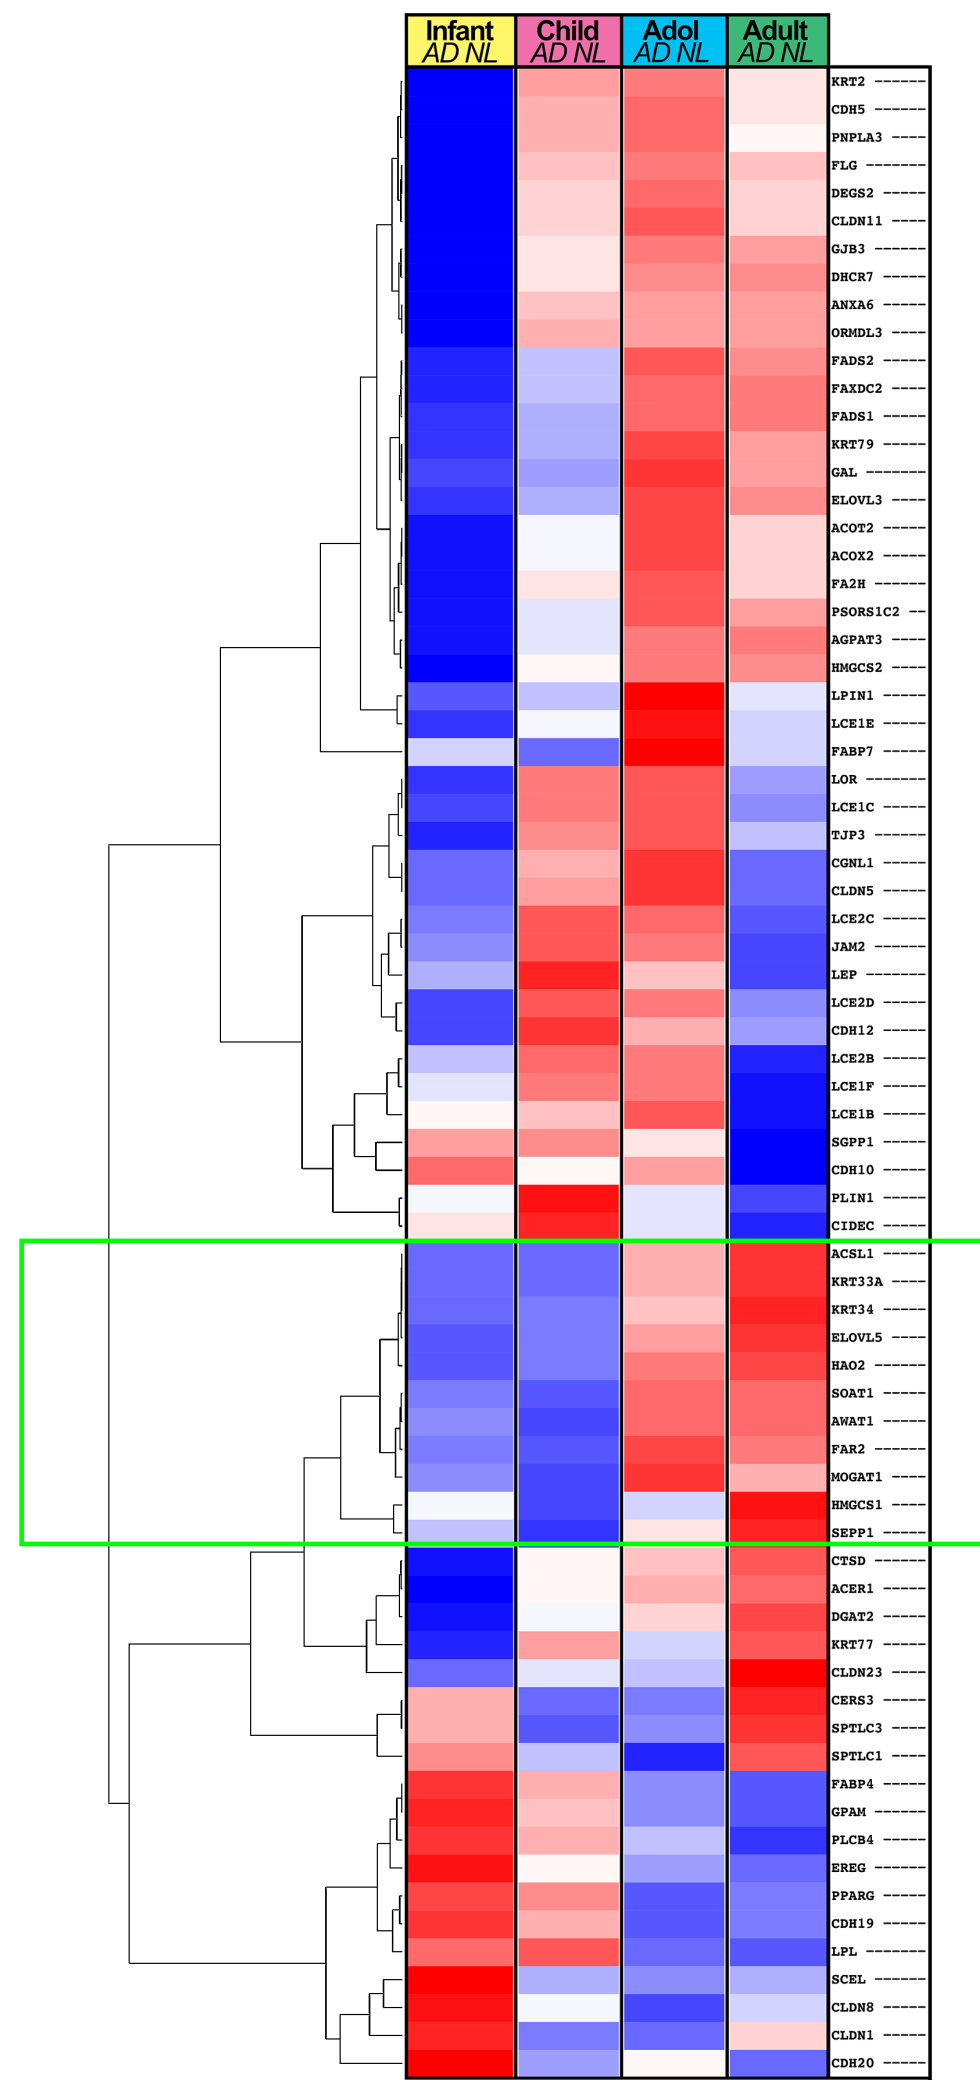

**Figure E9**

Pathways

$-\log_{10}(\text{FDR})$

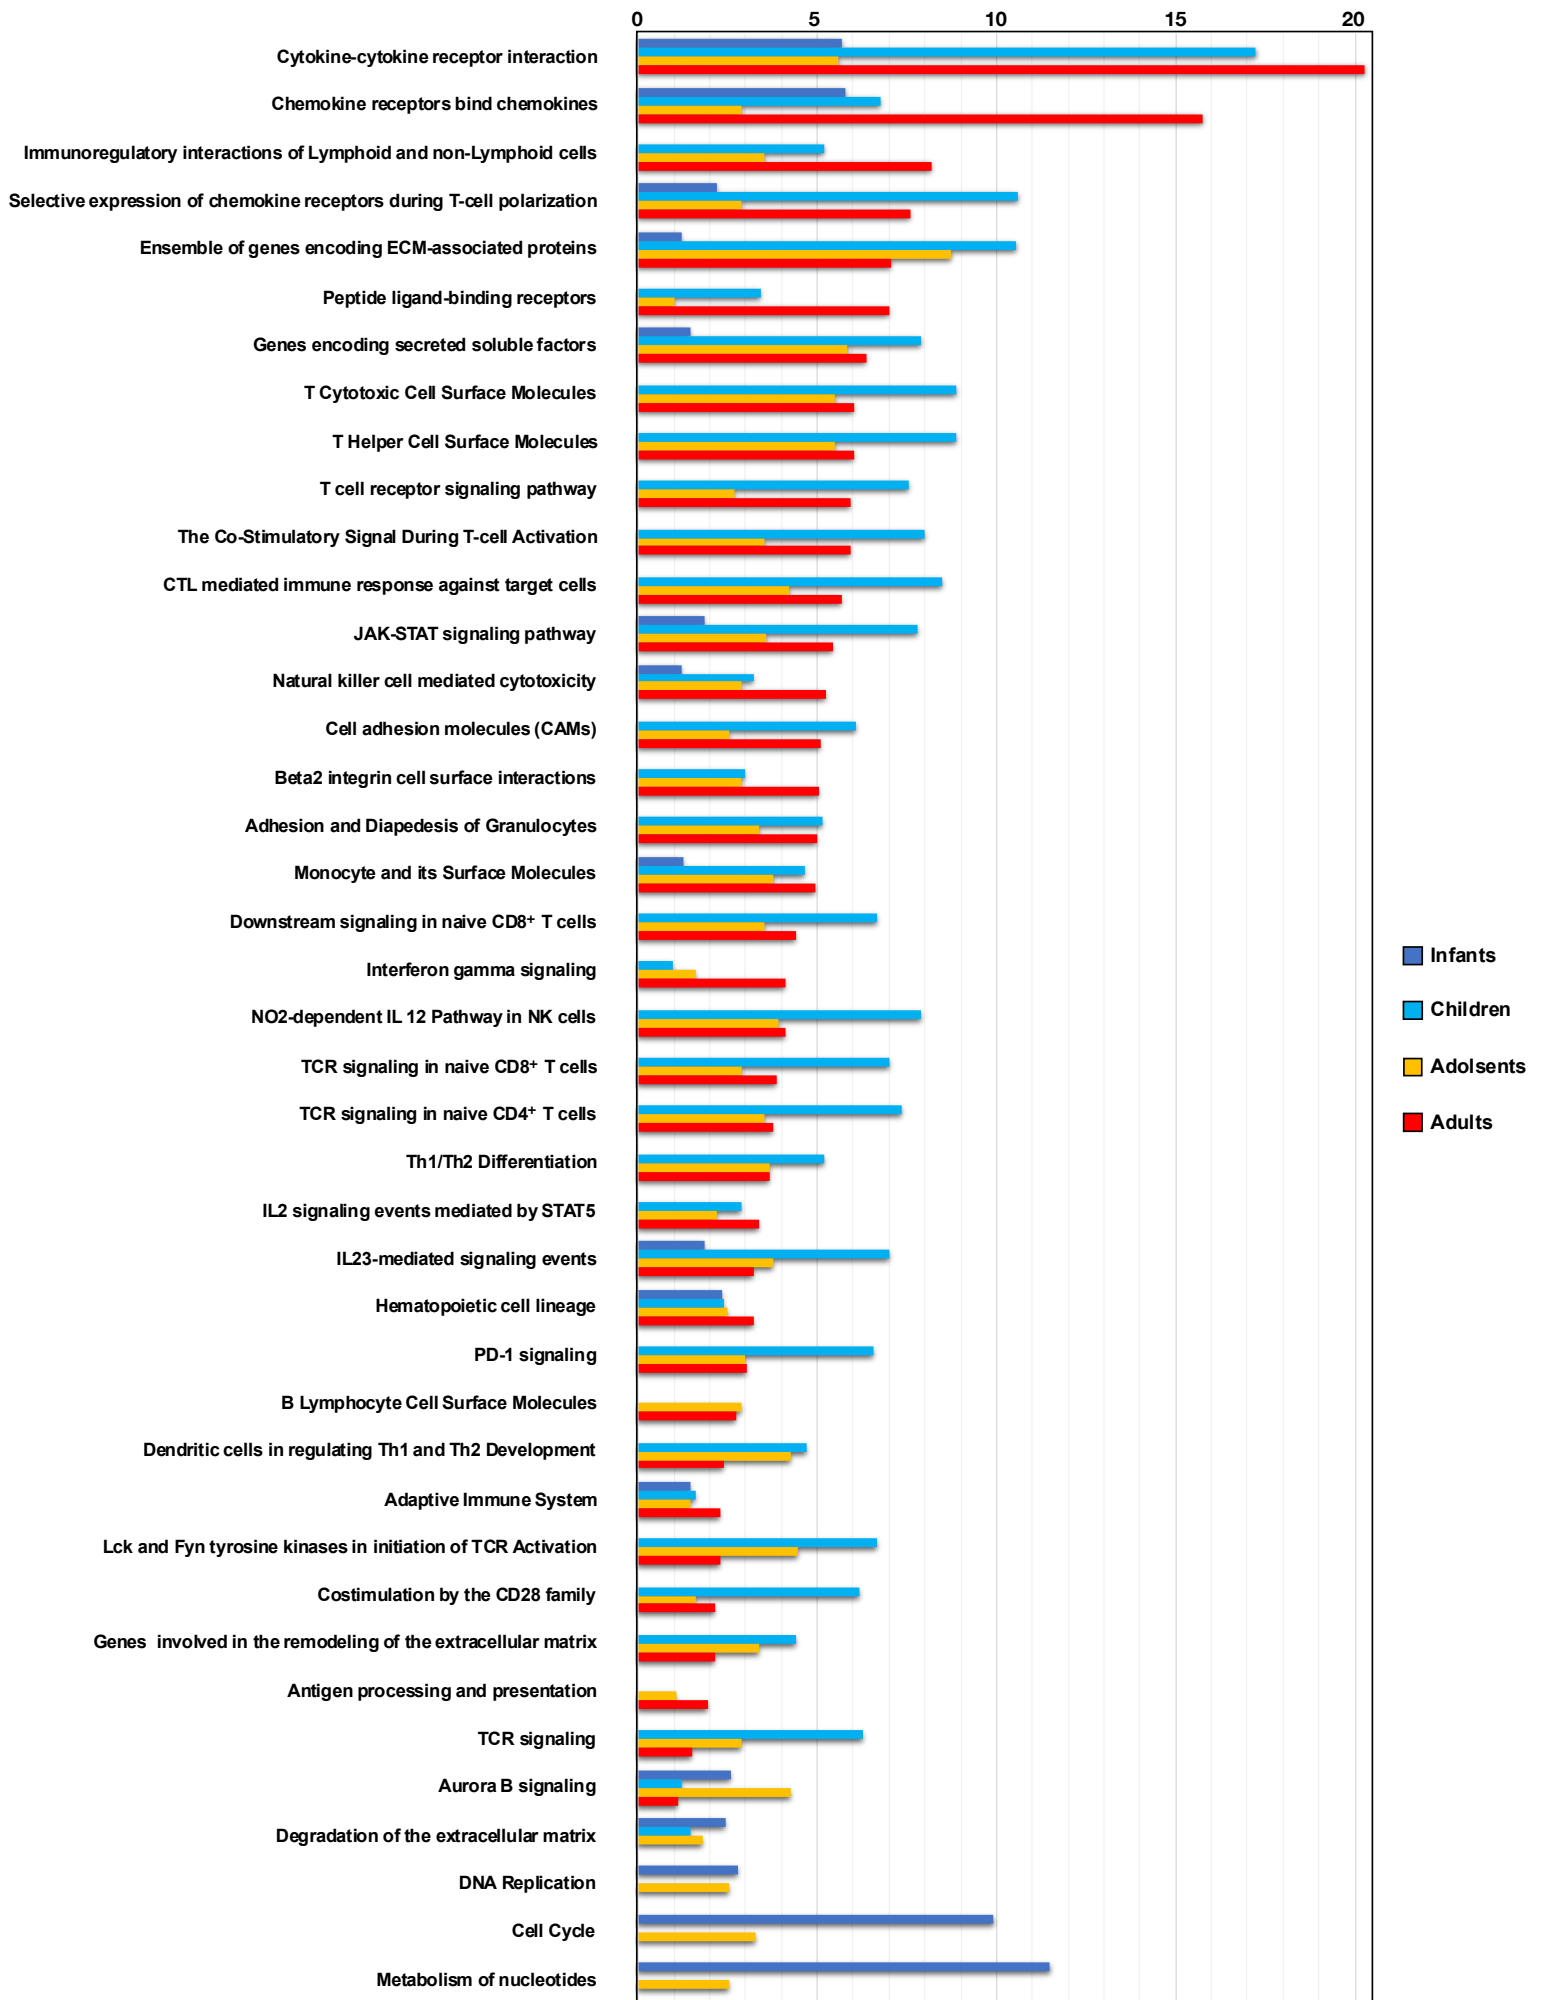

Figure E10

| Atopic Dermatitis |    |          |    | Markers    | Atopic Dermatitis |            |          |           |          |           |           |             |             |         |         |         |
|-------------------|----|----------|----|------------|-------------------|------------|----------|-----------|----------|-----------|-----------|-------------|-------------|---------|---------|---------|
| Infants           |    | Children |    |            | Adolescents       |            | Adults   |           | Infants  |           | Children  |             | Adolescents |         | Adults  |         |
| N                 | LS | N        | LS |            | N                 | LS         | N        | LS        | NL vs N  | LS vs N   | NL vs N   | LS vs N     | NL vs N     | LS vs N | NL vs N | LS vs N |
|                   |    |          |    | OX40L      | -1.27             | -1.19      | -1.32    | 1.29      | 1.07     | 1.48      | 1.68      | 3.61***     |             |         |         |         |
|                   |    |          |    | STAT1      | -1.74             | -1.71      | -1.45    | -1.21     | -1.63    | 1.00      | 1.46      | 2.60***     |             |         |         |         |
|                   |    |          |    | S100A9     | 11.40***          | 77.10***   | 15.10**  | 72.80***  | 5.55+    | 42.80***  | 13.00**   | 214.00***   |             |         |         |         |
|                   |    |          |    | S100A8     | 13.00***          | 98.60***   | 14.40*   | 60.70***  | 5.01+    | 46.40***  | 7.41*     | 151.00***   |             |         |         |         |
|                   |    |          |    | S100A7     | 19.80***          | 85.60***   | 26.30**  | 110.00*** | 9.77*    | 44.50***  | 18.40***  | 212.00***   |             |         |         |         |
|                   |    |          |    | S100A12    | 7.10*             | 105.00***  | 6.54+    | 27.80***  | 5.54     | 45.30**   | 6.32+     | 102.00***   |             |         |         |         |
|                   |    |          |    | PPL        | -2.86**           | -2.06+     | -1.30    | -1.36     | -1.46    | -1.20     | -1.08     | -1.03       |             |         |         |         |
|                   |    |          |    | PI3        | 4.83**            | 37.40***   | 3.46     | 13.30**   | 2.48     | 16.30**   | 6.29**    | 49.00***    |             |         |         |         |
|                   |    |          |    | MMP12      | 5.76**            | 20.00***   | 4.78     | 23.90***  | 2.22     | 13.00**   | 30.60***  | 261.00***   |             |         |         |         |
|                   |    |          |    | LCN2       | 1.16              | 5.05***    | 2.84+    | 4.81**    | 1.16     | 2.39      | 1.11      | 4.07**      |             |         |         |         |
|                   |    |          |    | KRT16      | 3.50**            | 31.90***   | 2.58     | 11.40***  | 2.04     | 12.60***  | 4.49*     | 51.70***    |             |         |         |         |
|                   |    |          |    | IL9        | 101.00**          | 6340.00*** | 180.00*  | 700.00**  | 9.05     | 91.20     | 318.00**  | 14900.00*** |             |         |         |         |
|                   |    |          |    | IL5        | 9.52*             | 17.80**    | -1.35    | 2.59      | 1.04     | 3.51      | 26.40***  | 114.00***   |             |         |         |         |
|                   |    |          |    | IL4R       | -1.76+            | 1.24       | 1.35     | 2.22*     | -1.07    | 2.24**    | 1.61+     | 3.54***     |             |         |         |         |
|                   |    |          |    | IL22RA1    | -1.81             | -1.94      | -1.16    | -1.49     | -1.59    | -1.66     | -1.08     | -1.12       |             |         |         |         |
|                   |    |          |    | IL21       | 5.85              | 17.40*     | 39.10*   | 333.00*** | 3.70     | 71.60**   | 102.00*** | 955.00***   |             |         |         |         |
|                   |    |          |    | IL20       | 1.89              | 6.98**     | 1.91     | 3.69*     | 2.21     | 8.86*     | 2.82      | 24.90***    |             |         |         |         |
|                   |    |          |    | IL17RA     | -3.36**           | -2.85**    | -1.15    | -1.31     | -1.55    | -1.18     | 1.13      | 1.41        |             |         |         |         |
|                   |    |          |    | IL15       | -1.78             | -1.72      | -1.02    | 1.23      | 1.20     | 1.64      | 1.15      | 2.24***     |             |         |         |         |
|                   |    |          |    | IFNG       | -1.01             | 3.18       | 2.19     | 3.34      | -1.01    | 1.87      | 2.55+     | 7.97***     |             |         |         |         |
|                   |    |          |    | FOXP3      | -1.88+            | -1.08      | 1.12     | 2.36*     | -1.18    | 2.44+     | 1.49      | 3.99***     |             |         |         |         |
|                   |    |          |    | FLG        | -1.27             | -1.67      | -1.63    | -1.38     | -1.02    | -1.70     | -2.69*    | -2.76**     |             |         |         |         |
|                   |    |          |    | DEFB4B     | 109.00***         | 1650.00*** | 38.00*   | 248.00*** | 64.10**  | 535.00*** | 27.10***  | 631.00***   |             |         |         |         |
|                   |    |          |    | CXCL9      | -1.57             | -1.11      | -1.26    | -1.00     | -1.28    | 1.85      | 4.08*     | 12.40***    |             |         |         |         |
|                   |    |          |    | CXCL8      | 1.73              | 12.00**    | 2.14     | 4.79*     | 3.33     | 17.50*    | 5.93**    | 40.10***    |             |         |         |         |
|                   |    |          |    | CXCL11     | -1.46             | -1.21      | -1.50    | -1.37     | -1.25    | 1.86      | 3.00+     | 9.96***     |             |         |         |         |
|                   |    |          |    | CXCL10     | 1.24              | 1.74       | -1.60    | -1.01     | -1.52    | 1.84      | 3.79*     | 14.80***    |             |         |         |         |
|                   |    |          |    | CXCL1      | 1.38              | 10.30***   | 1.25     | 3.90*     | 1.52     | 10.30**   | 3.51*     | 17.80***    |             |         |         |         |
|                   |    |          |    | CRLF2      | -1.79+            | -1.05      | -1.88    | 2.10      | -1.63    | 1.66      | 1.73+     | 4.96***     |             |         |         |         |
|                   |    |          |    | CCL26      | 1.49              | 2.11+      | 1.52     | 3.89***   | 1.11     | 2.20      | 3.72**    | 7.58***     |             |         |         |         |
|                   |    |          |    | CCL22      | -1.47             | 2.00       | 1.18     | 3.64**    | 1.10     | 2.54+     | 2.09*     | 7.82***     |             |         |         |         |
|                   |    |          |    | CCL18      | 2.28              | 6.91***    | 8.27*    | 42.20***  | 4.20+    | 15.00***  | 9.50**    | 42.40***    |             |         |         |         |
|                   |    |          |    | CCL17      | 1.20              | 5.11**     | 1.87     | 6.60*     | 1.08     | 3.98*     | 4.04**    | 18.10***    |             |         |         |         |
|                   |    |          |    | CCL13      | -1.31             | 1.17       | 3.47*    | 6.39***   | 1.70     | 3.03*     | 1.69      | 4.20***     |             |         |         |         |
|                   |    |          |    | CAMP       | 1.68              | 10.60***   | 1.44     | 3.07+     | -1.49    | 1.82      | 2.04      | 8.14***     |             |         |         |         |
|                   |    |          |    | MX1        | -1.27             | 1.70       | -1.38    | 1.15      | -1.54    | 1.35      | 1.68      | 3.81***     |             |         |         |         |
|                   |    |          |    | IL31       | 3.90+             | 62.80***   | 4.98     | 29.40***  | 4.03     | 11.20+    | 4.25      | 36.70***    |             |         |         |         |
|                   |    |          |    | IL4        | -1.55             | 1.34       | 3.97+    | 3.16+     | 4.13     | 4.22      | -2.02     | 1.23        |             |         |         |         |
|                   |    |          |    | OX40       | -2.30**           | 1.05       | -1.29    | 1.75      | 1.44     | 2.95*     | 1.29      | 3.61***     |             |         |         |         |
|                   |    |          |    | LOR        | -1.92             | -3.30*     | -1.78    | -1.58     | -1.74    | -7.61*    | -3.65*    | -4.89***    |             |         |         |         |
|                   |    |          |    | IL2        | 1.80              | 2.12       | 1.49     | 4.54*     | -1.23    | 1.25      | 1.12      | 3.24**      |             |         |         |         |
|                   |    |          |    | IL1B       | -1.48             | 3.03*      | -1.75    | -1.09     | -1.38    | 1.54      | 1.09      | 1.67        |             |         |         |         |
|                   |    |          |    | IL17C      | -1.17             | 2.09       | 1.30     | 1.87      | 2.16     | 4.16+     | 1.49      | 5.21**      |             |         |         |         |
|                   |    |          |    | CCL21      | -1.71             | -1.22      | -1.24    | 1.06      | -1.72    | 1.33      | -2.05*    | -1.09       |             |         |         |         |
|                   |    |          |    | CCL20      | 2.41              | 4.84**     | 1.71     | 2.87      | -2.62    | -1.11     | 4.32*     | 9.87***     |             |         |         |         |
|                   |    |          |    | CCL19      | -1.06             | 1.28       | 1.33     | 1.77      | -1.09    | 1.85      | 1.14      | 3.19**      |             |         |         |         |
|                   |    |          |    | IL26       | 7.89**            | 29.80***   | 19.40**  | 77.20***  | 5.75     | 21.50**   | 6.55**    | 29.30***    |             |         |         |         |
|                   |    |          |    | EREG       | 2.09+             | 3.06**     | 1.13     | 1.87      | -1.19    | -1.01     | -1.31     | -1.17       |             |         |         |         |
|                   |    |          |    | KYNU       | 4.26**            | 10.20***   | 1.86     | 5.16***   | 2.60+    | 7.08***   | -1.03     | 1.61*       |             |         |         |         |
|                   |    |          |    | TNFA       | 2.08+             | 2.11*      | 1.29     | 1.39      | -1.12    | 1.08      | 1.23      | 2.00***     |             |         |         |         |
|                   |    |          |    | iNOS       | -3.13*            | -5.50***   | -1.84    | -3.79*    | 1.35     | -2.51     | 1.12      | -1.33       |             |         |         |         |
|                   |    |          |    | CCL27      | 3.69***           | 1.33       | 1.54     | 1.16      | -1.06    | -1.61     | -1.34     | 1.10        |             |         |         |         |
|                   |    |          |    | CCL7       | 16.50***          | 90.00***   | 5.99+    | 50.80***  | 2.25     | 11.00+    | 2.46      | 34.40***    |             |         |         |         |
|                   |    |          |    | CLDN23     | -1.98**           | -2.85***   | -1.38    | -3.75***  | -1.67    | -3.30**   | -1.68*    | -3.12***    |             |         |         |         |
|                   |    |          |    | CLDN8      | 1.00              | -4.08***   | -1.13    | -5.06***  | -2.60+   | -7.07***  | -1.13     | -2.46***    |             |         |         |         |
|                   |    |          |    | CLDN1      | 1.30              | -1.50      | -1.38    | -2.46*    | -2.22*   | -5.39***  | -1.29+    | -1.88***    |             |         |         |         |
|                   |    |          |    | IL37       | -1.27             | -6.10***   | -1.88    | -3.74*    | -1.85    | -8.48**   | -2.88**   | -11.40***   |             |         |         |         |
|                   |    |          |    | IL34       | -1.33             | -4.31***   | -1.43    | -3.82**   | -1.64    | -7.02***  | -1.51+    | -3.01***    |             |         |         |         |
|                   |    |          |    | IL33       | 1.45              | 1.08       | -1.70    | -1.98+    | -1.75+   | -2.08*    | -1.39+    | -1.45*      |             |         |         |         |
|                   |    |          |    | IL17F      | 18.90*            | 204.00***  | 5.79     | 79.40**   | -6.10    | 4.11      | -1.29     | 12.70+      |             |         |         |         |
|                   |    |          |    | IL19       | 323.00***         | 3330.00*** | 4.54     | 49.90***  | 15.30    | 351.00**  | 17.40**   | 264.00***   |             |         |         |         |
|                   |    |          |    | IL22       | 41.10**           | 357.00***  | 281.00** | 1810.00** | 179.00** | 1390.00** | 224.00**  | 5740.00***  |             |         |         |         |
|                   |    |          |    | INFa       | 1.03              | 2.35       | -1.18    | 19.10***  | -7.11+   | -1.90     | 5.93*     | 7.37*       |             |         |         |         |
|                   |    |          |    | IL12/23p40 | 1.20              | 1.65       | -1.47    | 4.46*     | 1.07     | 2.23      | 2.07      | 7.41***     |             |         |         |         |
|                   |    |          |    | IL23p19    | 1.68              | 3.46***    | 1.49     | 2.77*     | 1.47     | 2.86+     | 1.09      | 2.80**      |             |         |         |         |
|                   |    |          |    | IL36G      | 5.03***           | 17.90***   | 1.52     | 6.54**    | 2.61     | 8.32***   | 1.30      | 3.81***     |             |         |         |         |
|                   |    |          |    | IL1R1      | 1.10              | 1.31       | -1.36    | -1.02     | -1.22    | 1.14      | 1.09      | 1.40+       |             |         |         |         |
|                   |    |          |    | IL10       | -1.42             | 1.57       | -1.15    | 3.02*     | -1.30    | 1.45      | 1.89+     | 4.86***     |             |         |         |         |
|                   |    |          |    | IL1RL1     | 1.03              | -1.06      | -1.32    | 1.04      | -1.45    | -1.24     | -1.12     | 1.10        |             |         |         |         |
|                   |    |          |    | IL13       | 7.15***           | 18.50***   | 32.90**  | 162.00*** | 4.48     | 19.60*    | 7.60***   | 49.10***    |             |         |         |         |
|                   |    |          |    | IL17A      | 18.00*            | 212.00***  | 8.70     | 150.00**  | 5.01     | 211.00**  | 10.70     | 66.50**     |             |         |         |         |

Figure E11

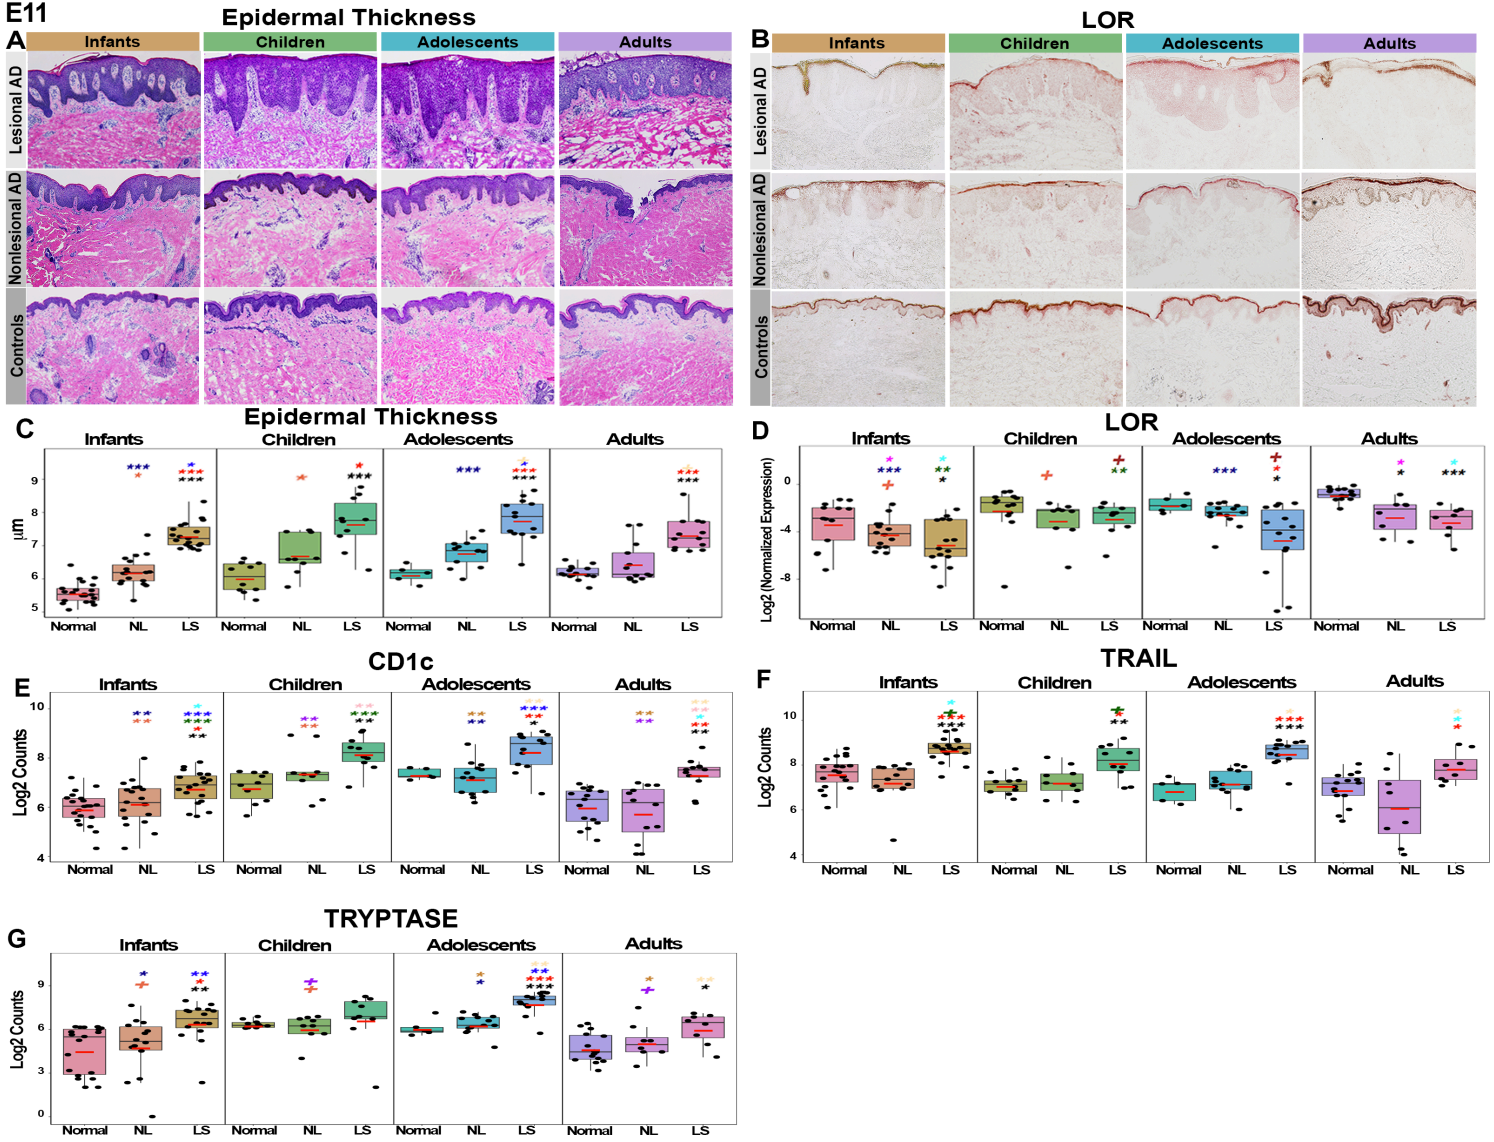



Figure E12

**Ki67**

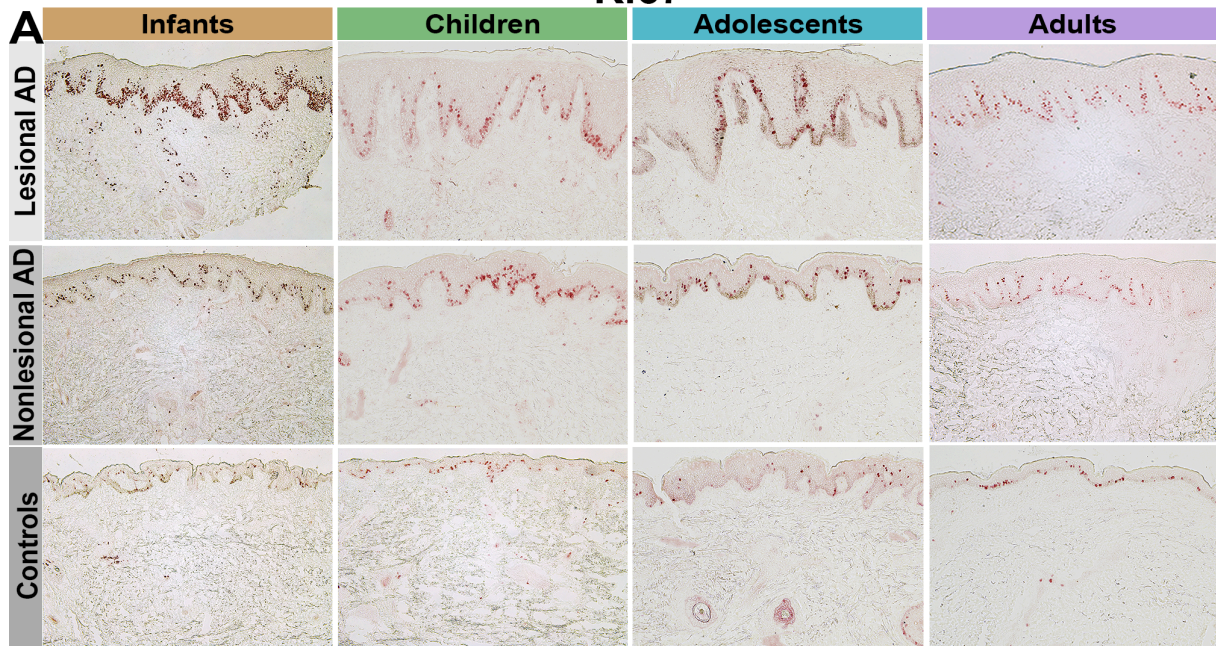

**CD3**

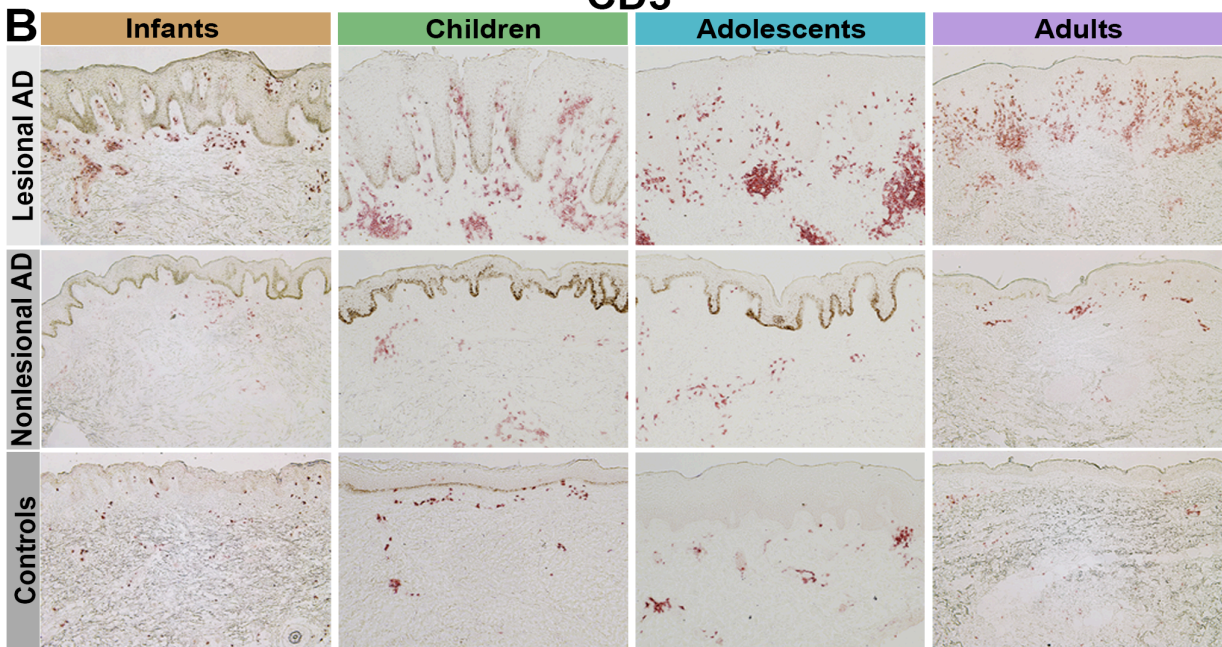

**CD11c**

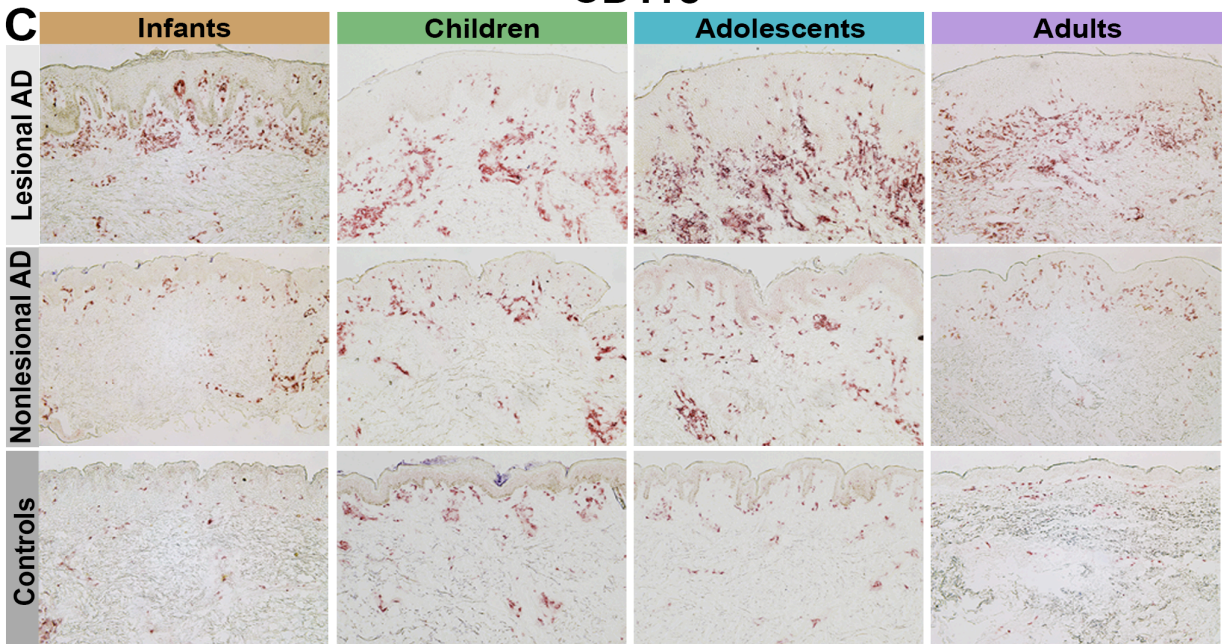



Figure E13

DC-LAMP

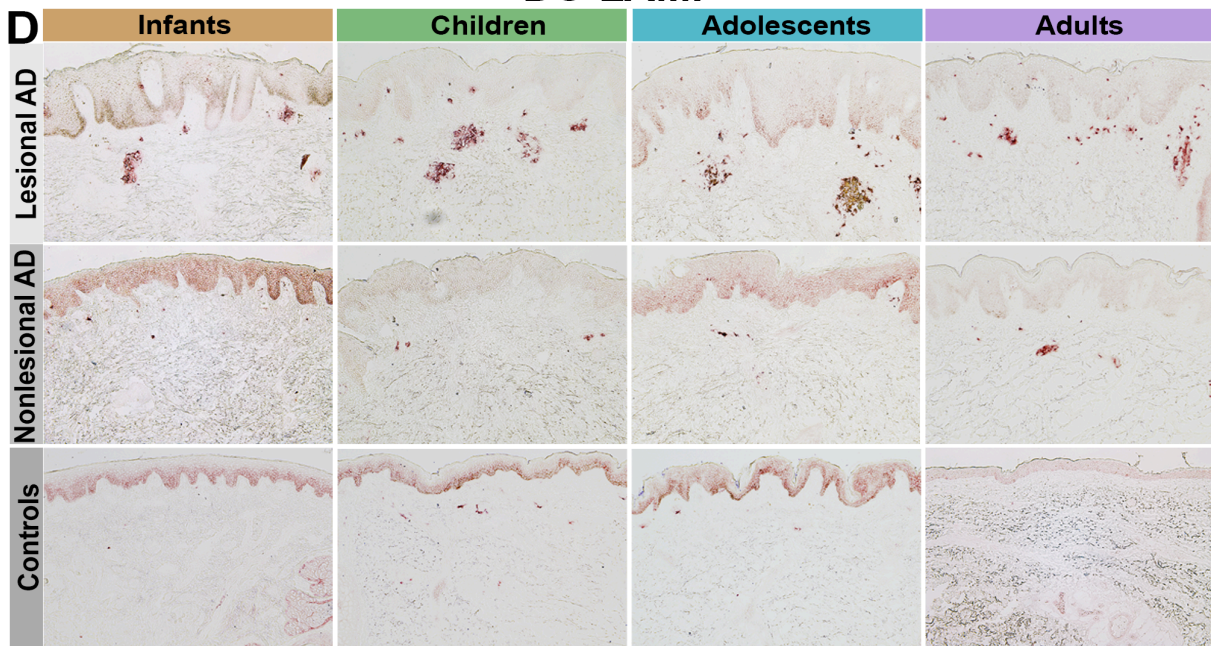

FC $\epsilon$ R1

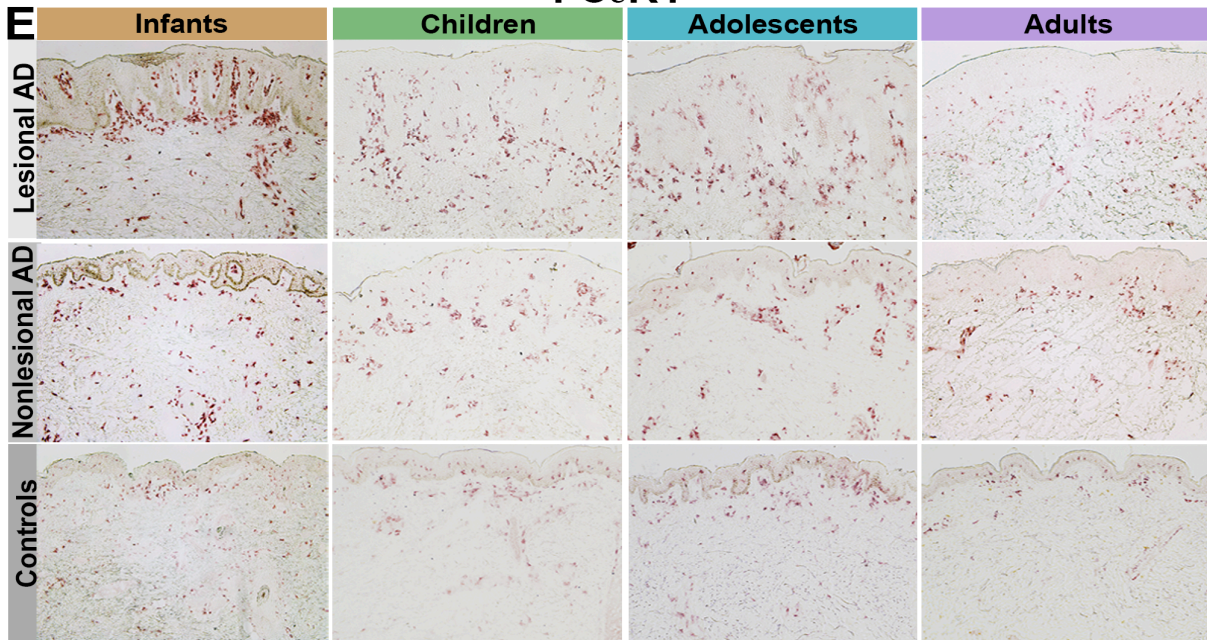

CD206

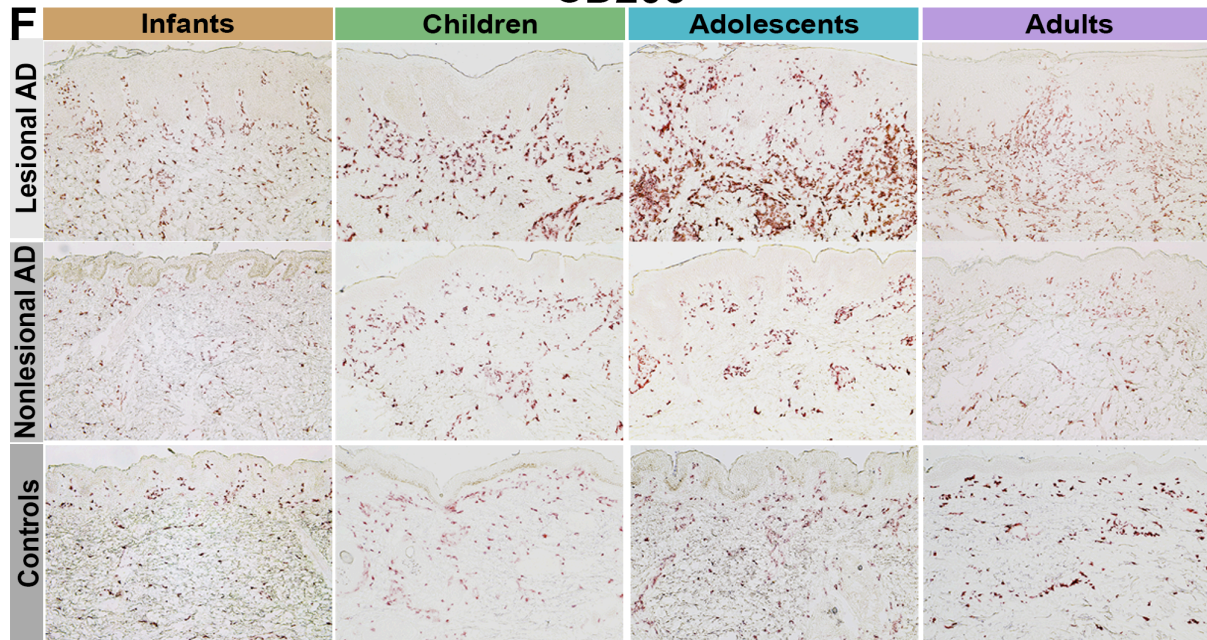



Figure E14

### Major Basic Protein

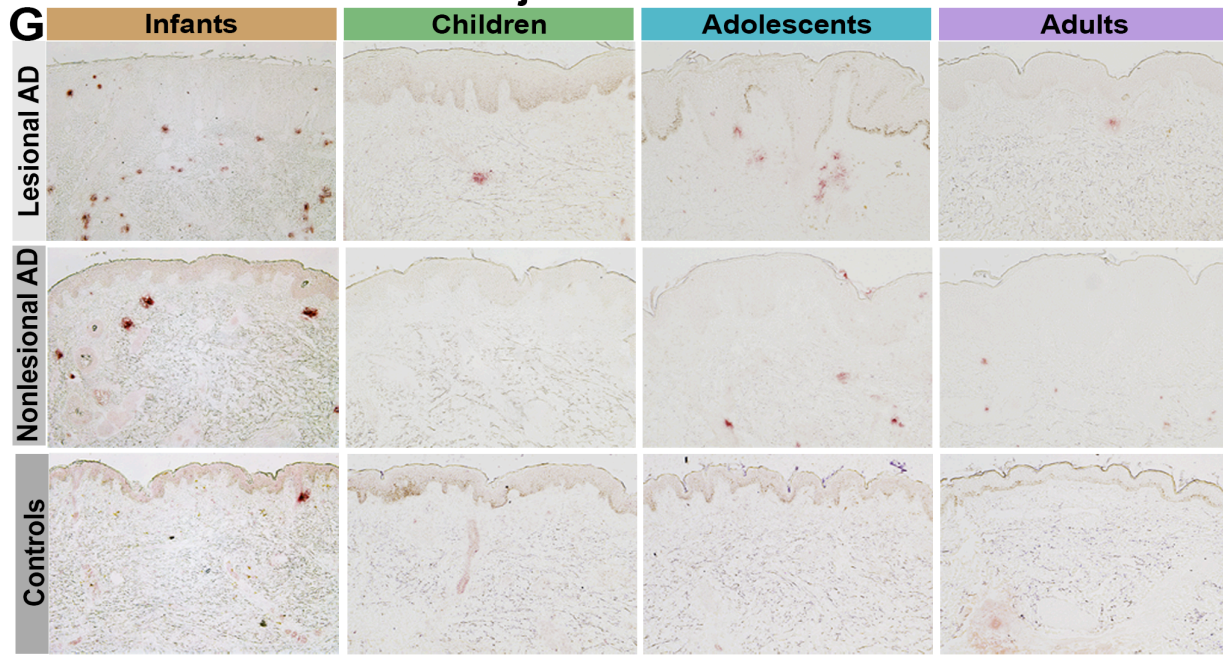

### Neutrophil Elastase

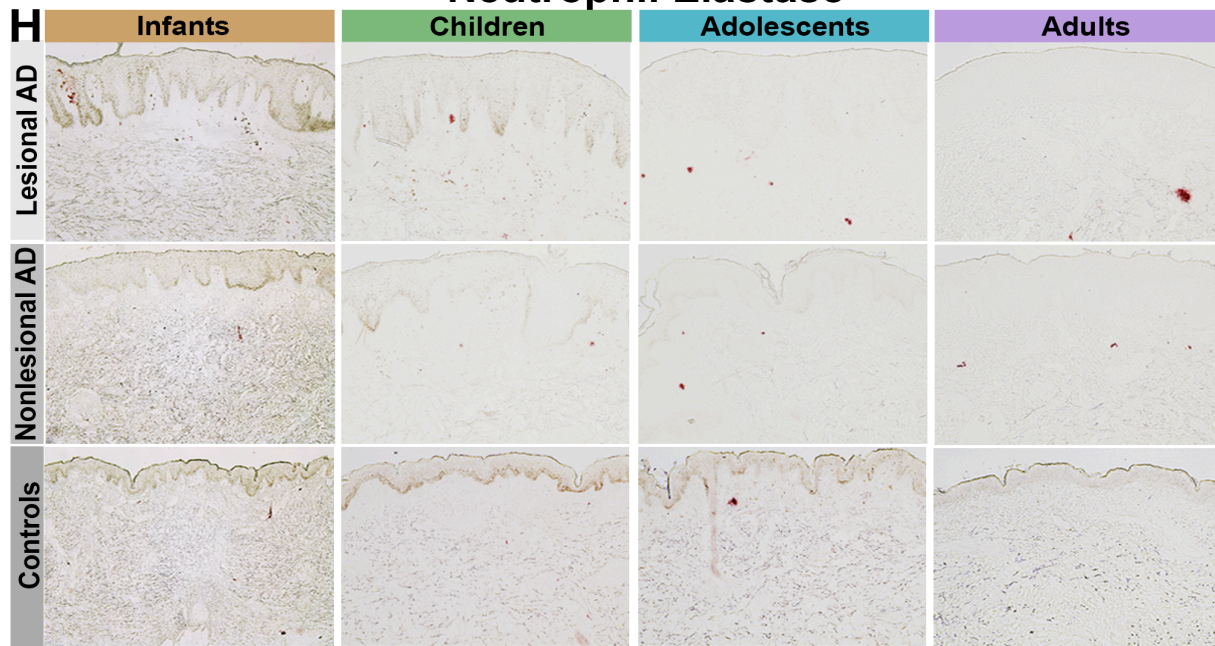

Figure E15

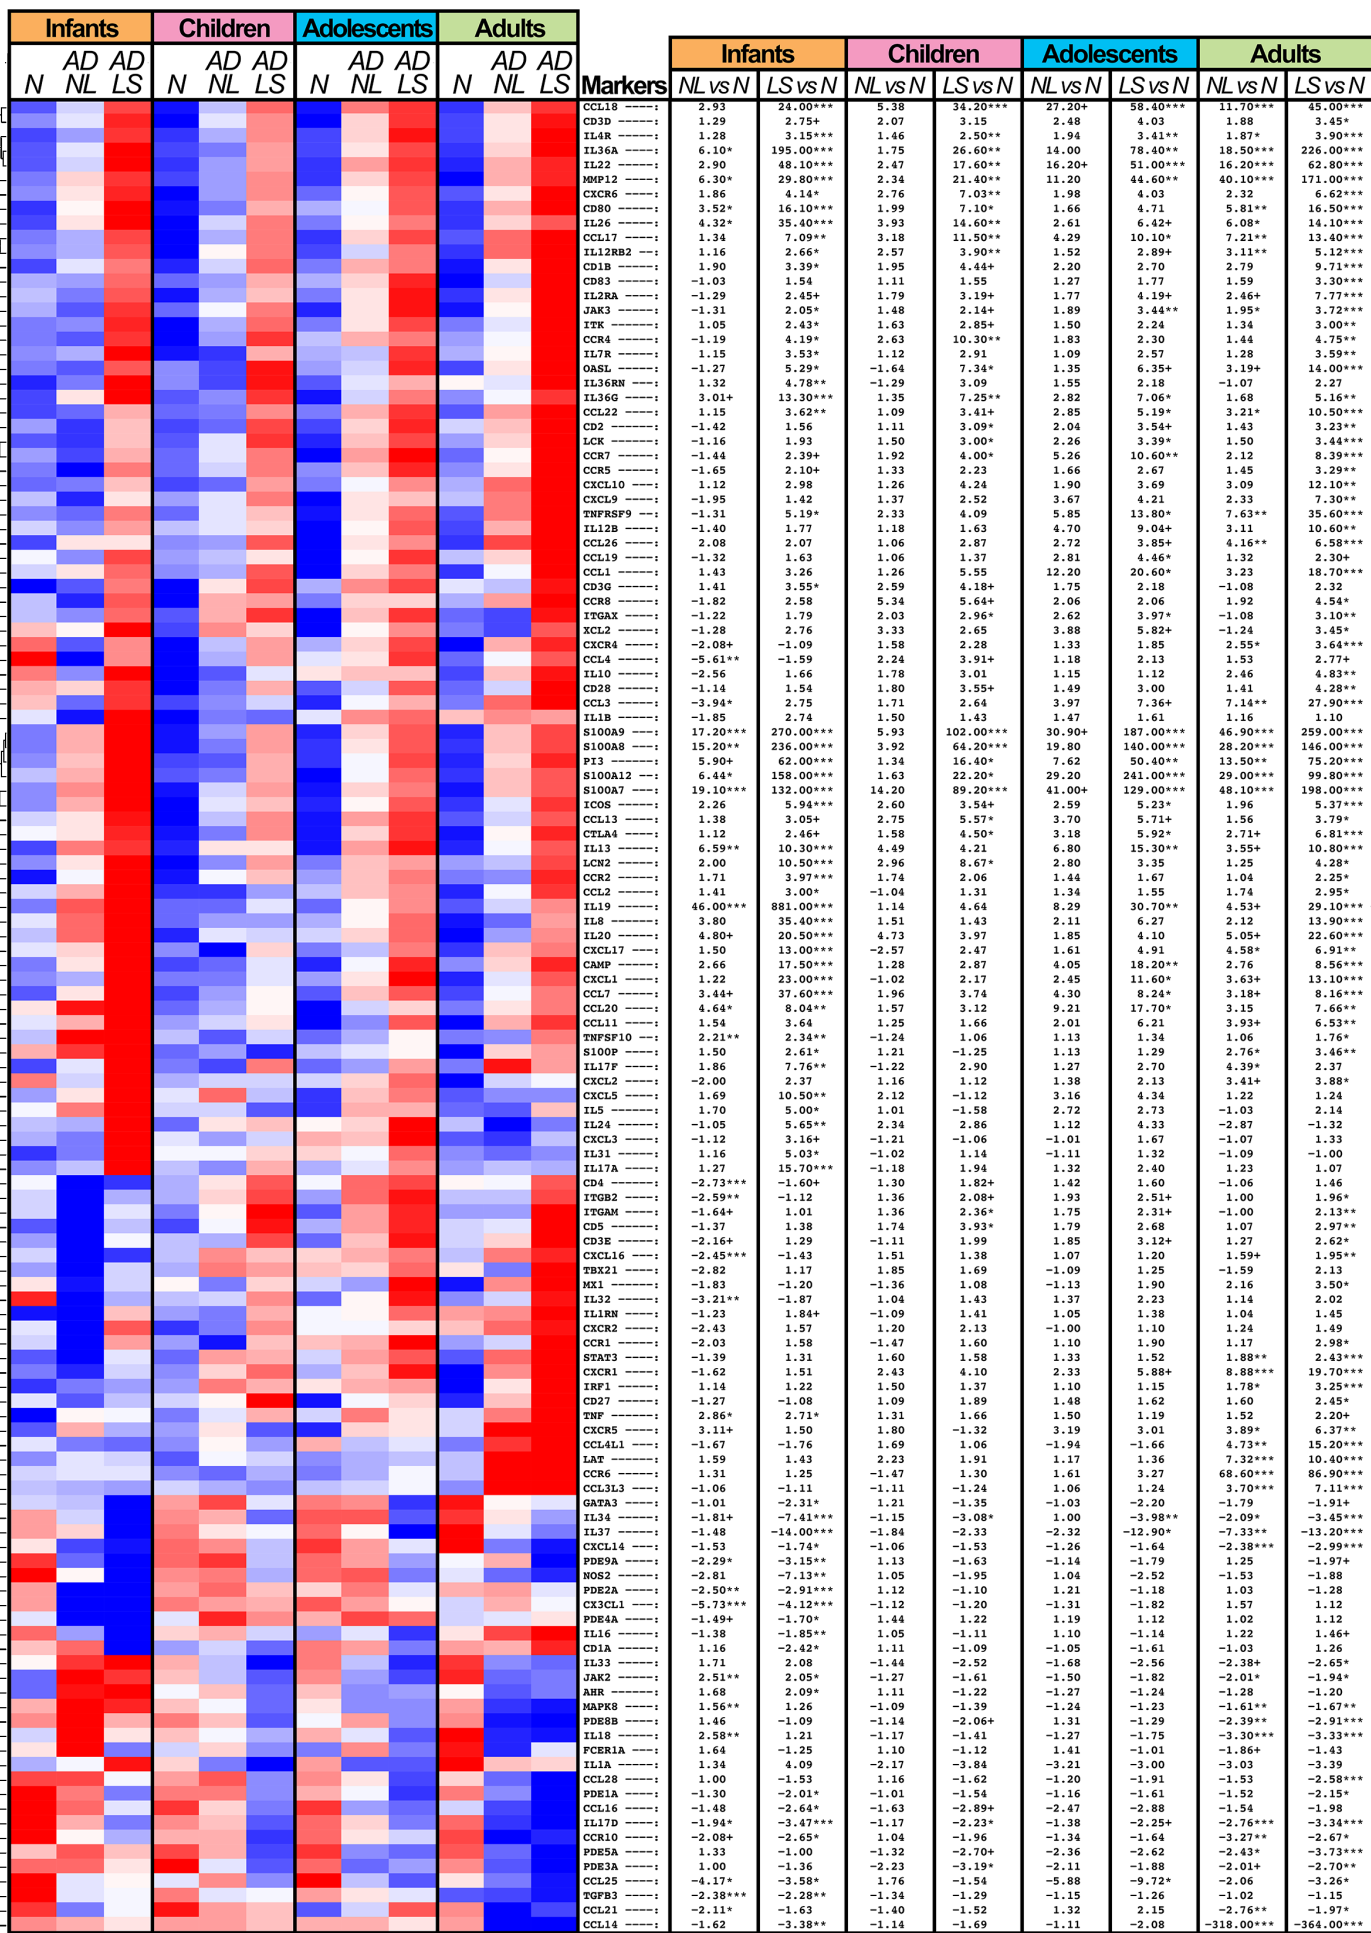

Figure E16

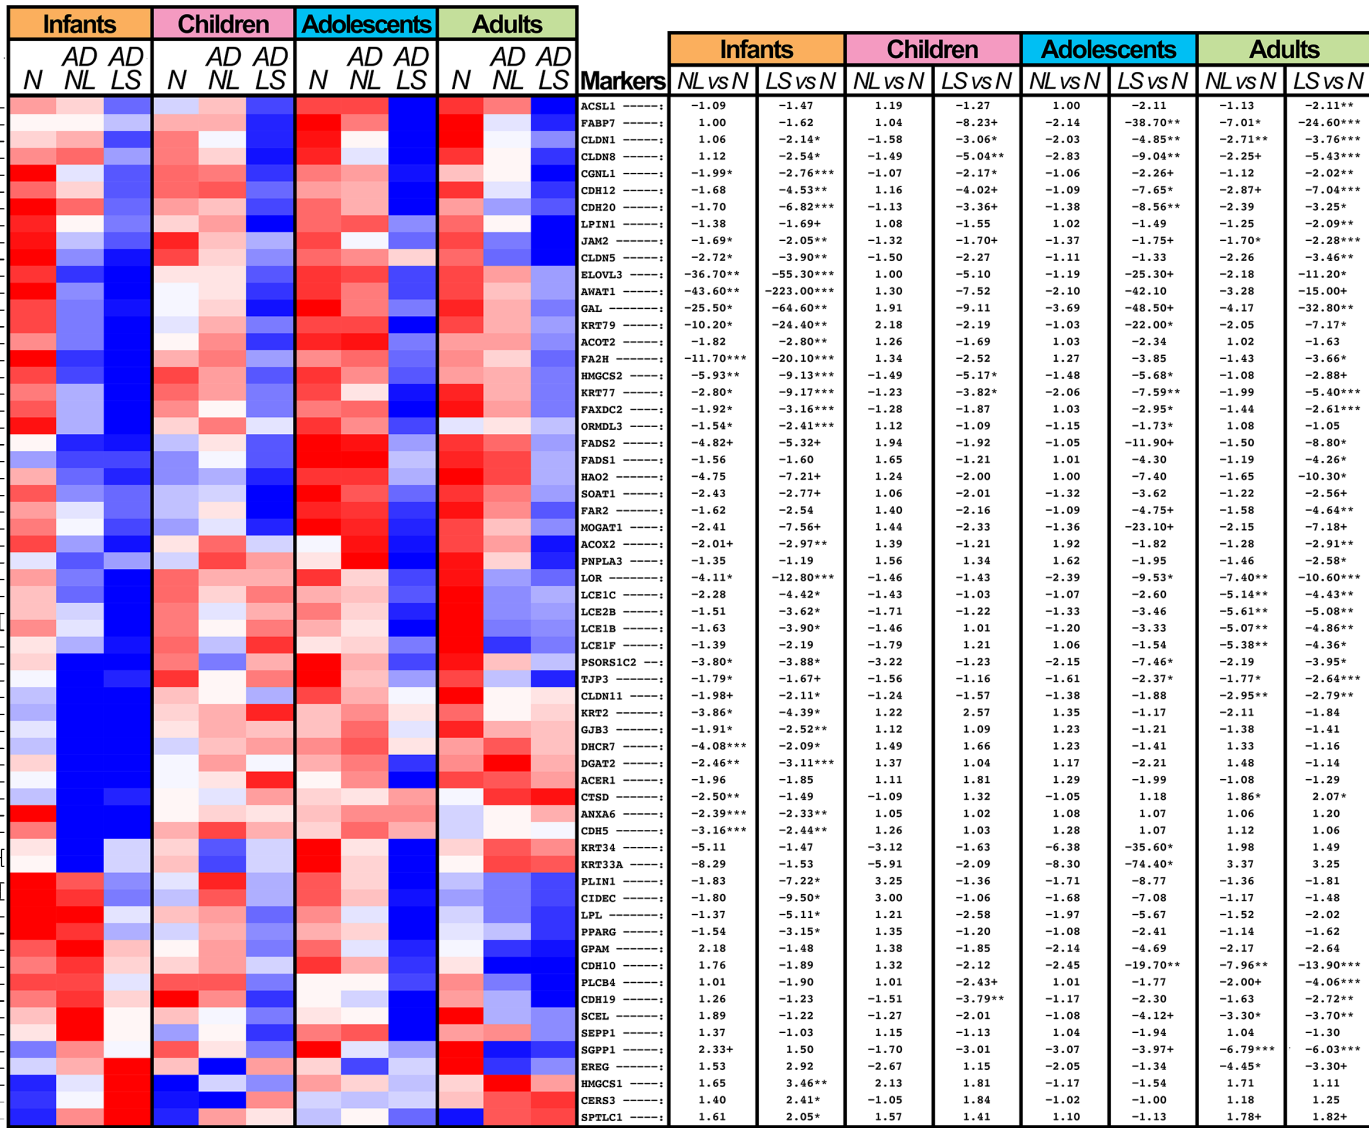

Supplement: NIHMS1814529-supplement-Renert-Yuval_PMID33453290_SupplFigsE1-E16.pdf [file NIHMS1814529-supplement-Renert-Yuval_PMID33453290_SupplFigsE1-E16.pdf]
